# Supplementary material
Source: PubMed Central journal article supplement (PMC7855384)
Supplement: NIHMS1645813-supplement-1.pdf [file NIHMS1645813-supplement-1.pdf]

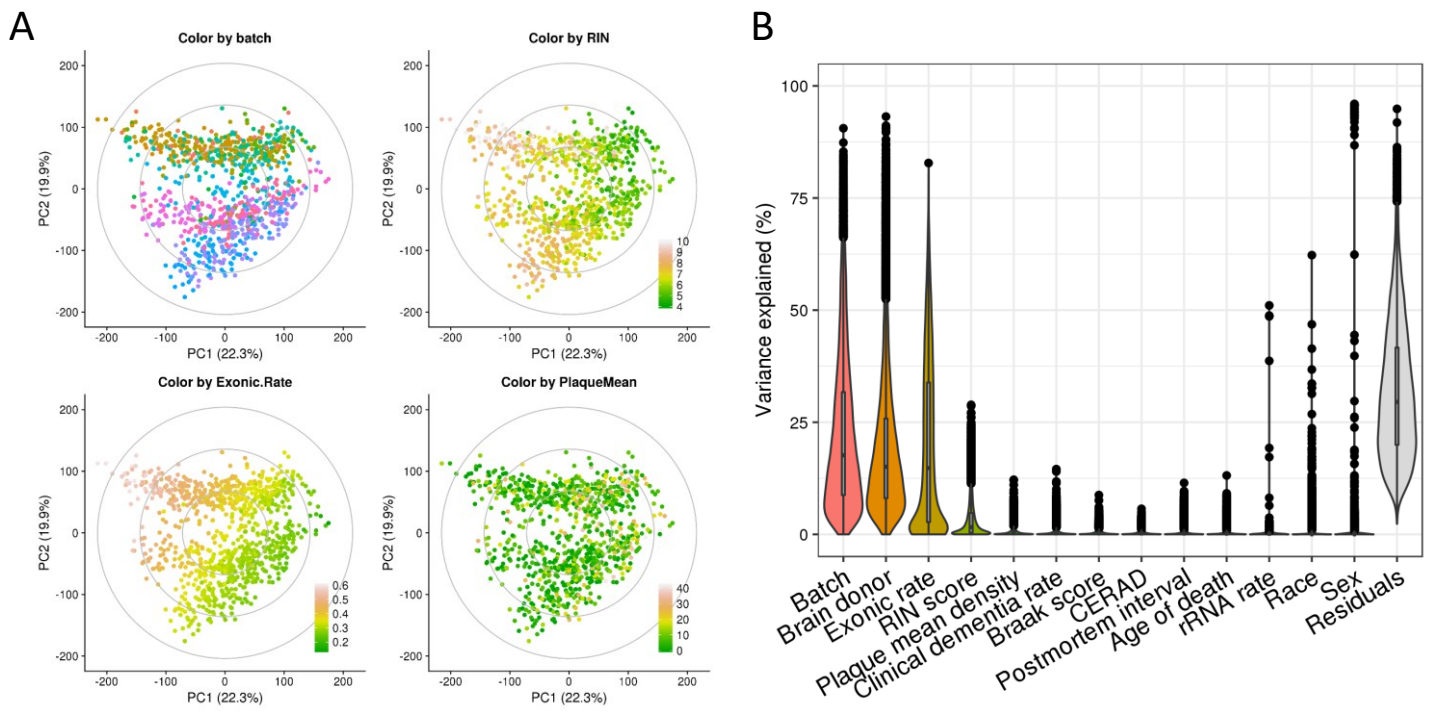

**Fig. S1. RNA-seq data correction for confounding factors, related to STAR Methods.** **A**, Principal component (PC) plots showing the association between biological/technical variables and top PCs. **B**, Distribution of variance explained by the biological/technical variables according to variancePartition analysis. From left to right, variables were sorted in descending order by median fraction of variance explained.

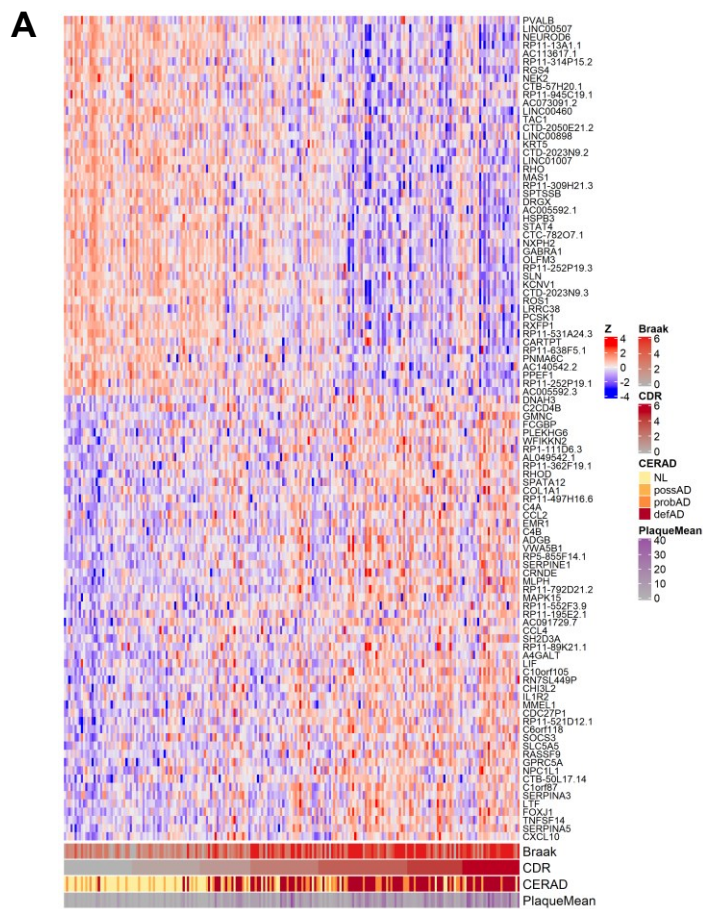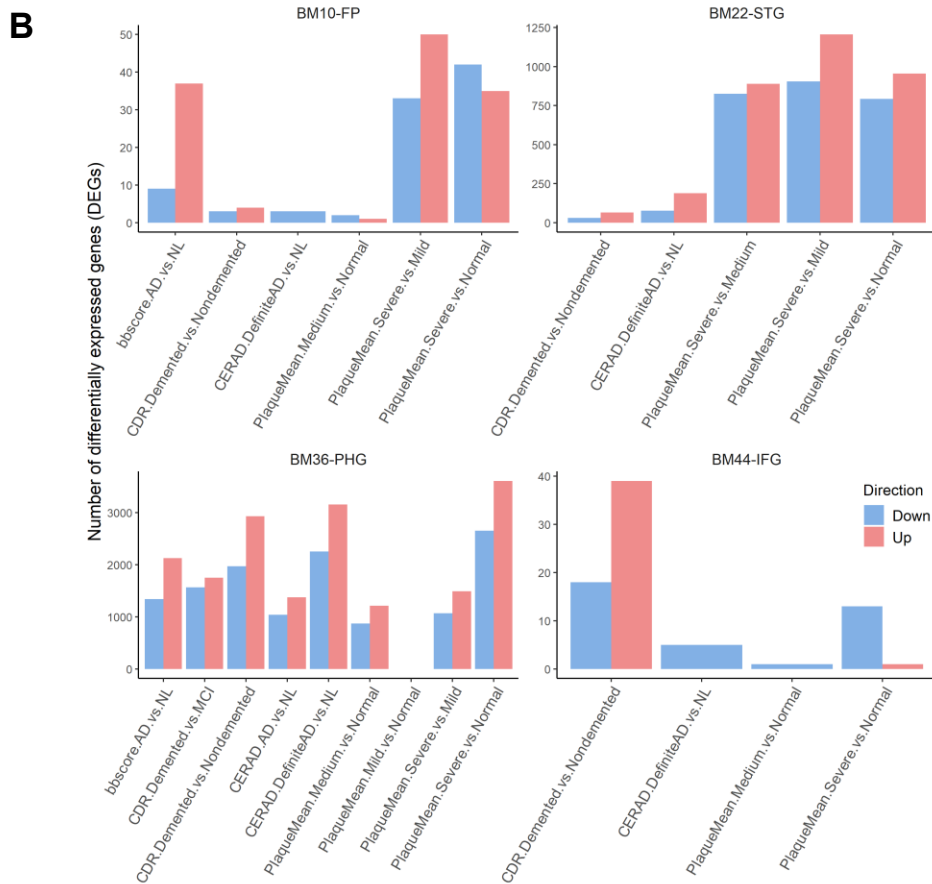

**Fig. S2. Summary of differential expression signatures, related to STAR Methods.** **A**, Heat-map showing the expression variation of top 100 differentially expressed genes (DEGs) ranked by fold change in the BM36-PHG region. The expression of each gene were scaled into z-values. Sample-level trait values were annotated in the bottom. **B**, bar-plot showing the number of DEGs identified in each contrast for each region regarding 4 different cognitive/neuropathological traits. X-axis denotes the trait-specific contrast. Down, down-regulated DEGs; Up, up-regulated DEGs.

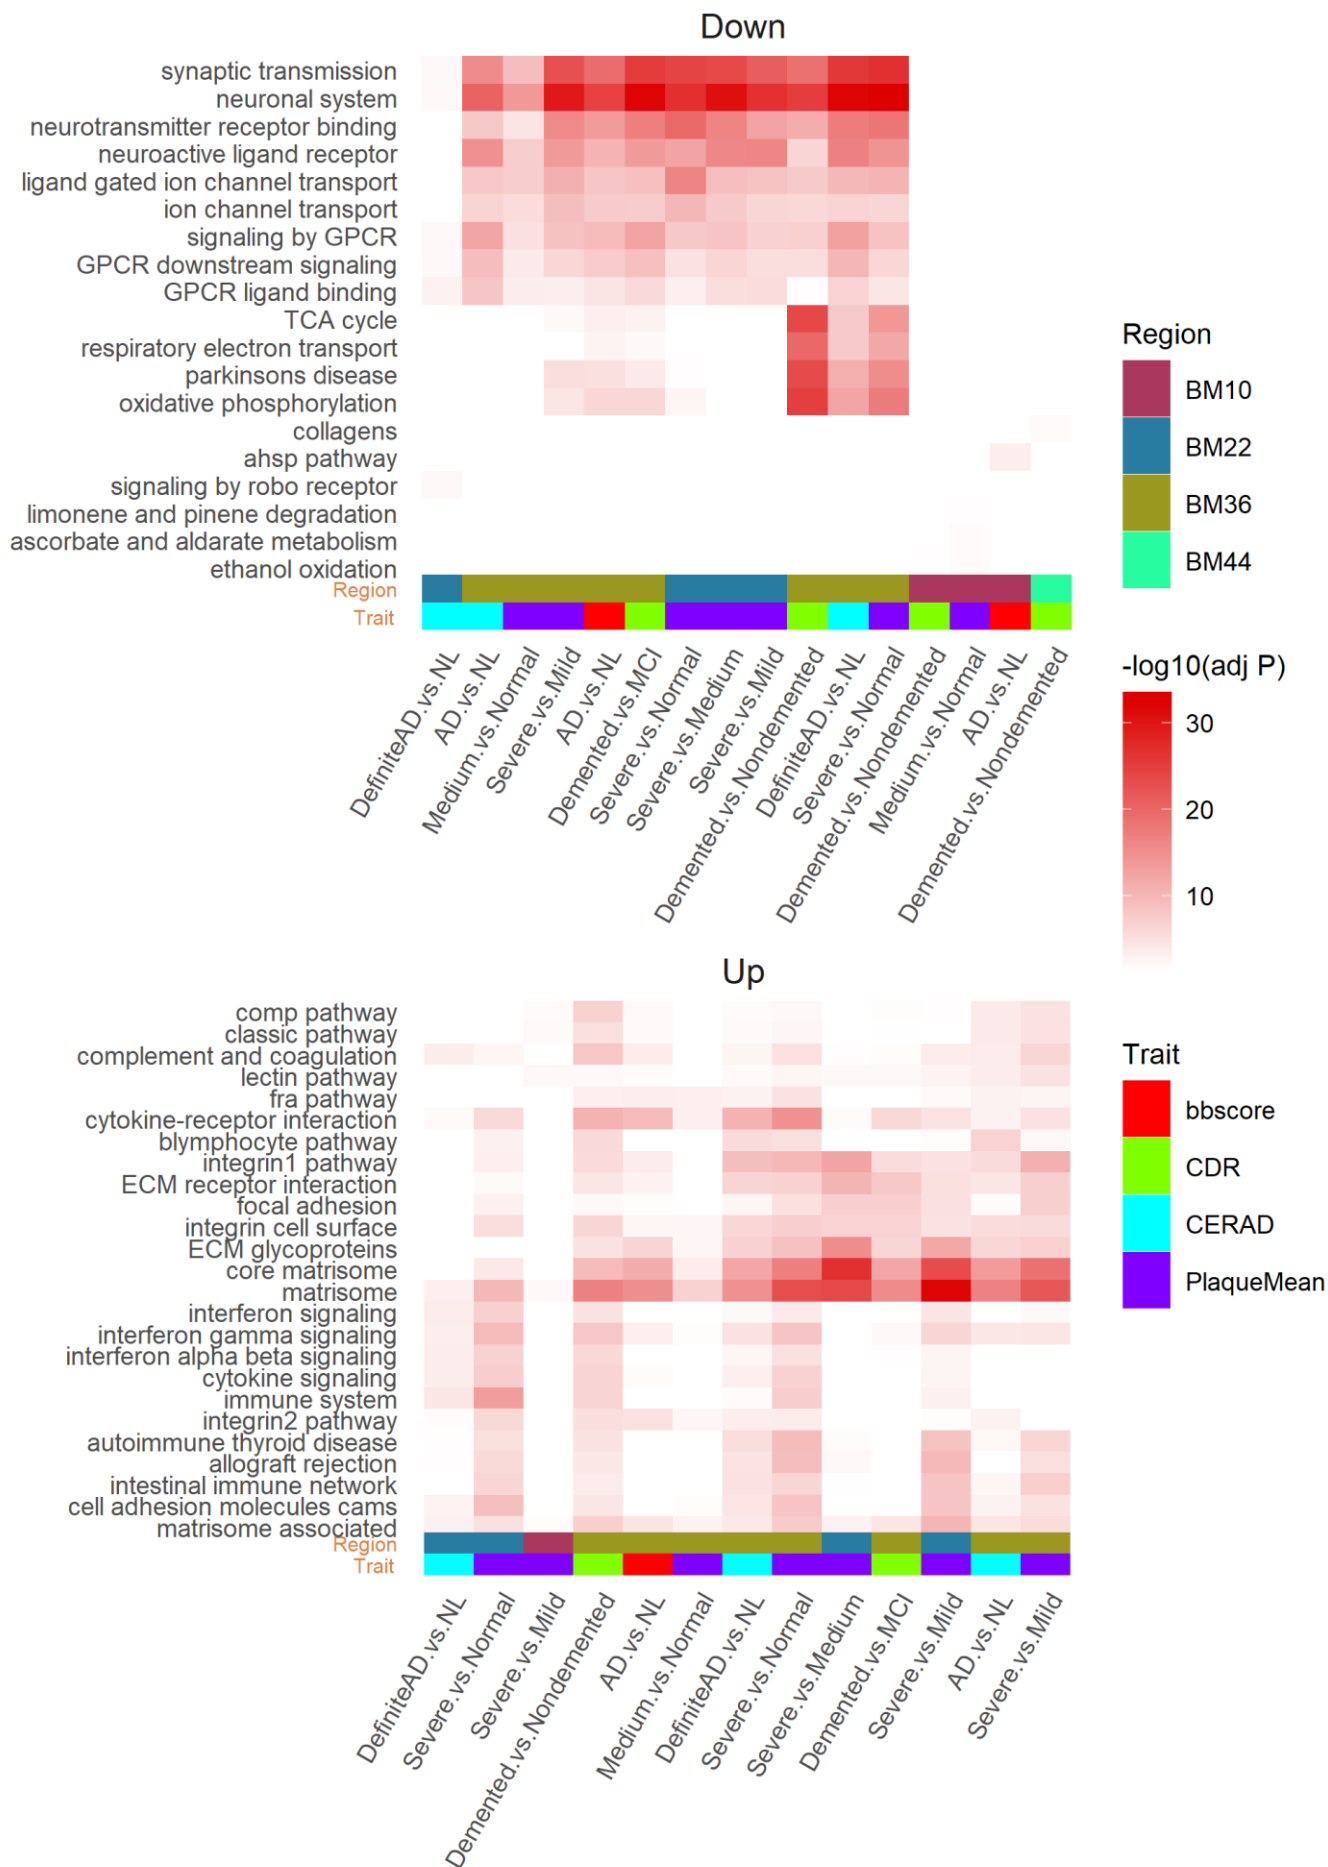

**Fig. S3. Summary of gene ontology (GO)/pathways enriched in differential expression signatures, related to STAR Methods.** Top pathways enriched in the present down-regulated (top) or up-regulated (bottom) DEGs. Columns denote different set of DEGs from 4 brain regions regarding 4 different cognitive/neuropathological traits and rows denote GO/pathways. Down, down-regulated DEGs; Up, up-regulated DEGs.

### Down

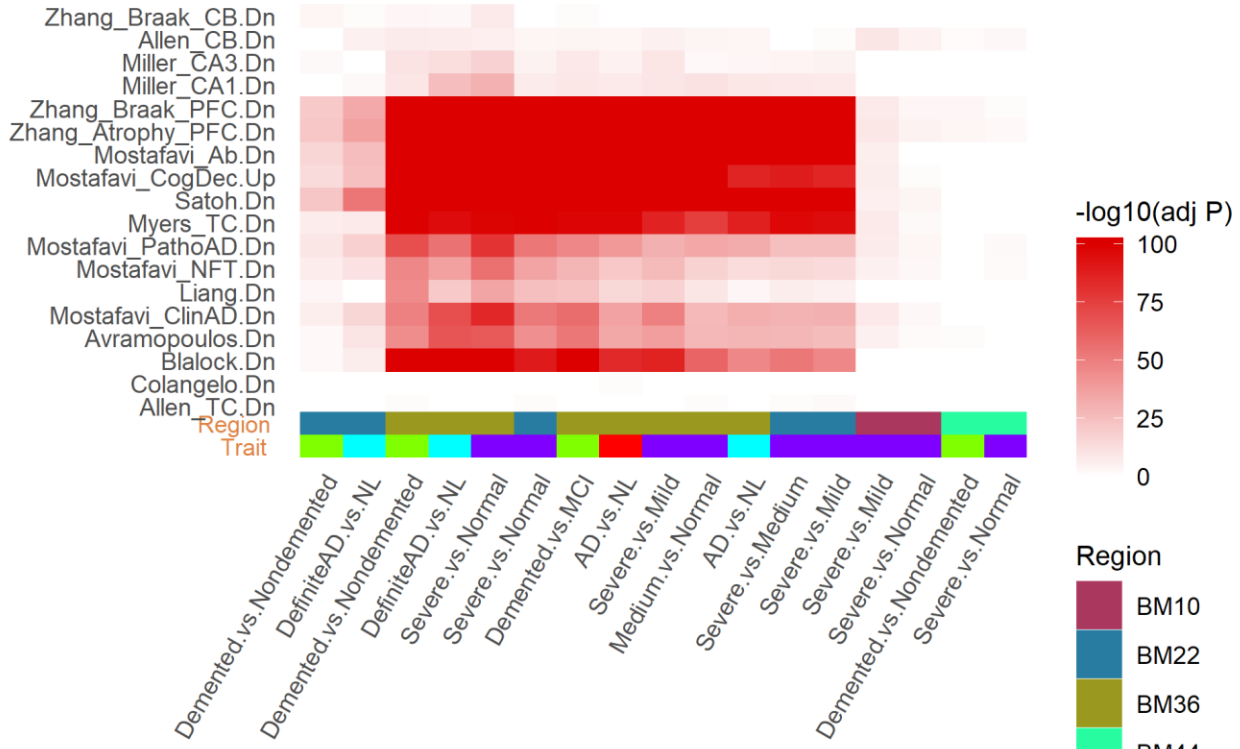

### Up

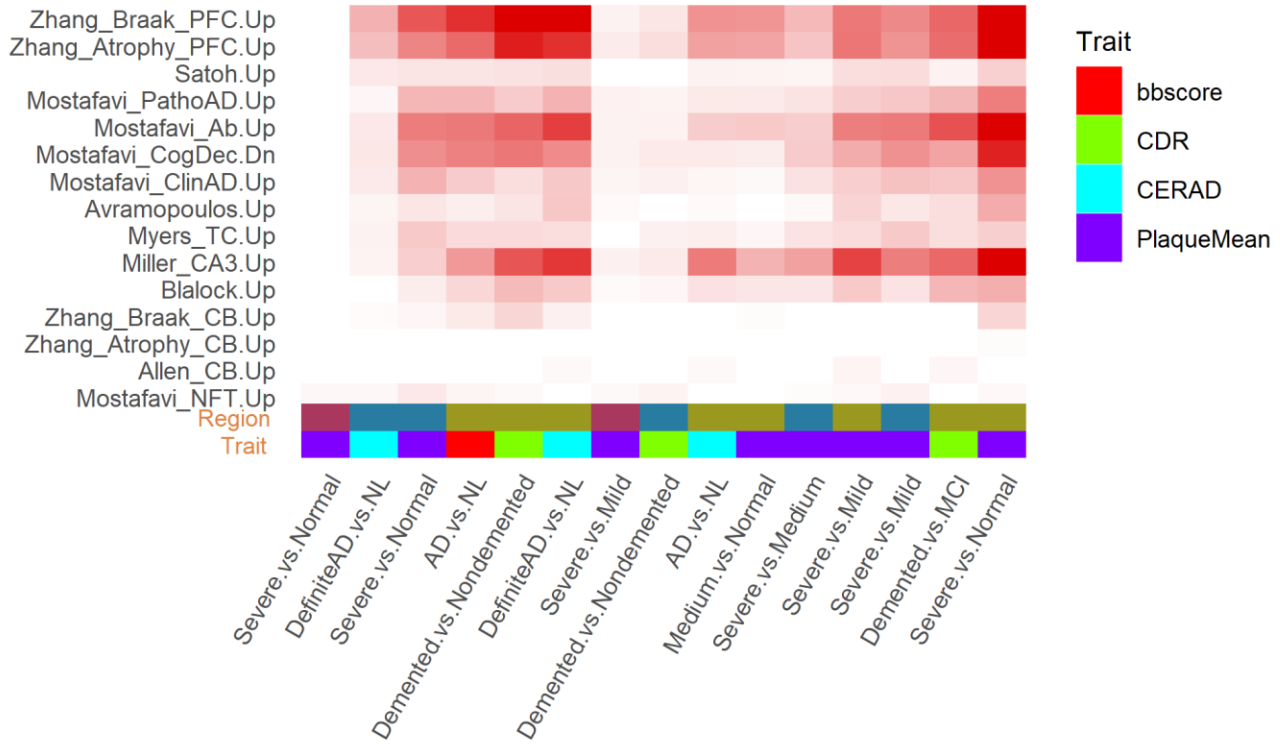

**Fig. S4. Preservation of differential expression signatures in published bulk-tissue transcriptomic analysis datasets, related to STAR Methods.** Public AD signatures enriched in the present down-regulated (top) or up-regulated (bottom) DEGs. In each panel, columns denote the present region-specific DEGs stratified by region, trait and contrast. The rows denote public AD signatures written in a format of “signature.direction”, where “direction” is either Dn (down-regulated) or Up (up-regulated), and “signature” includes: 1) Allen\_CB, signature detected in the cerebellum region from Allen et al 2018, 2) Allen\_TC, signature detected in the temporal cortex region from Allen et al 2018, 3) Avramopoulos, signature detected in the temporal lobe from Avramopoulos et al 2011, 4) Blalock, signature detected in the hippocampus from Blalock et al 2004, 5) Colangelo, signature detected in the hippocampus CA1 region from Colangelo et al 2002, 6) Liang, signature detected in multiple cortex areas from Liang et al 2008, 7) Miller\_CA1, signature detected in the hippocampus CA1 region from Miller et al 2013, 8) Miller\_CA3, signature detected in the hippocampus CA3 region from Miller et al 2013, 9) Mostafavi\_Ab, signature correlated with B amyloid in the prefrontal cortex (PFC) region from Mostafavi et al 2018, 10) Mostafavi\_ClinAD, signature correlated with clinical diagnostic of AD in the PFC from Mostafavi et al 2018, 11) Mostafavi\_CogDec, signature correlated with cognitive decline in the PFC from Mostafavi et al 2018, 12) Mostafavi\_PathoAD, signature correlated with AD pathology in the PFC from Mostafavi et al 2018, 13) Satoh; signature detected in the frontal cortex region from Satoh et al 2014, 14) Myers\_TC, signature computed by comparing gene expression between AD and control with limma from the temporal cortex region from Webster et al 2009, 15) Zhang\_Atrophy\_CB, signature correlated with atrophy in the cerebellum region from Zhang et al 2013, 16) Zhang\_Atrophy\_PFC, signature correlated with atrophy in the PFC from Zhang et al 2013, 17) Zhang\_Braak\_CB, signature correlated with Braak staging in the cerebellum region from Zhang et al 2013, 18) Zhang\_Braak\_PFC, signature correlated with Braak staging in the PFC from Zhang et al 2013. The references of the public AD signatures are listed in supplementary text.

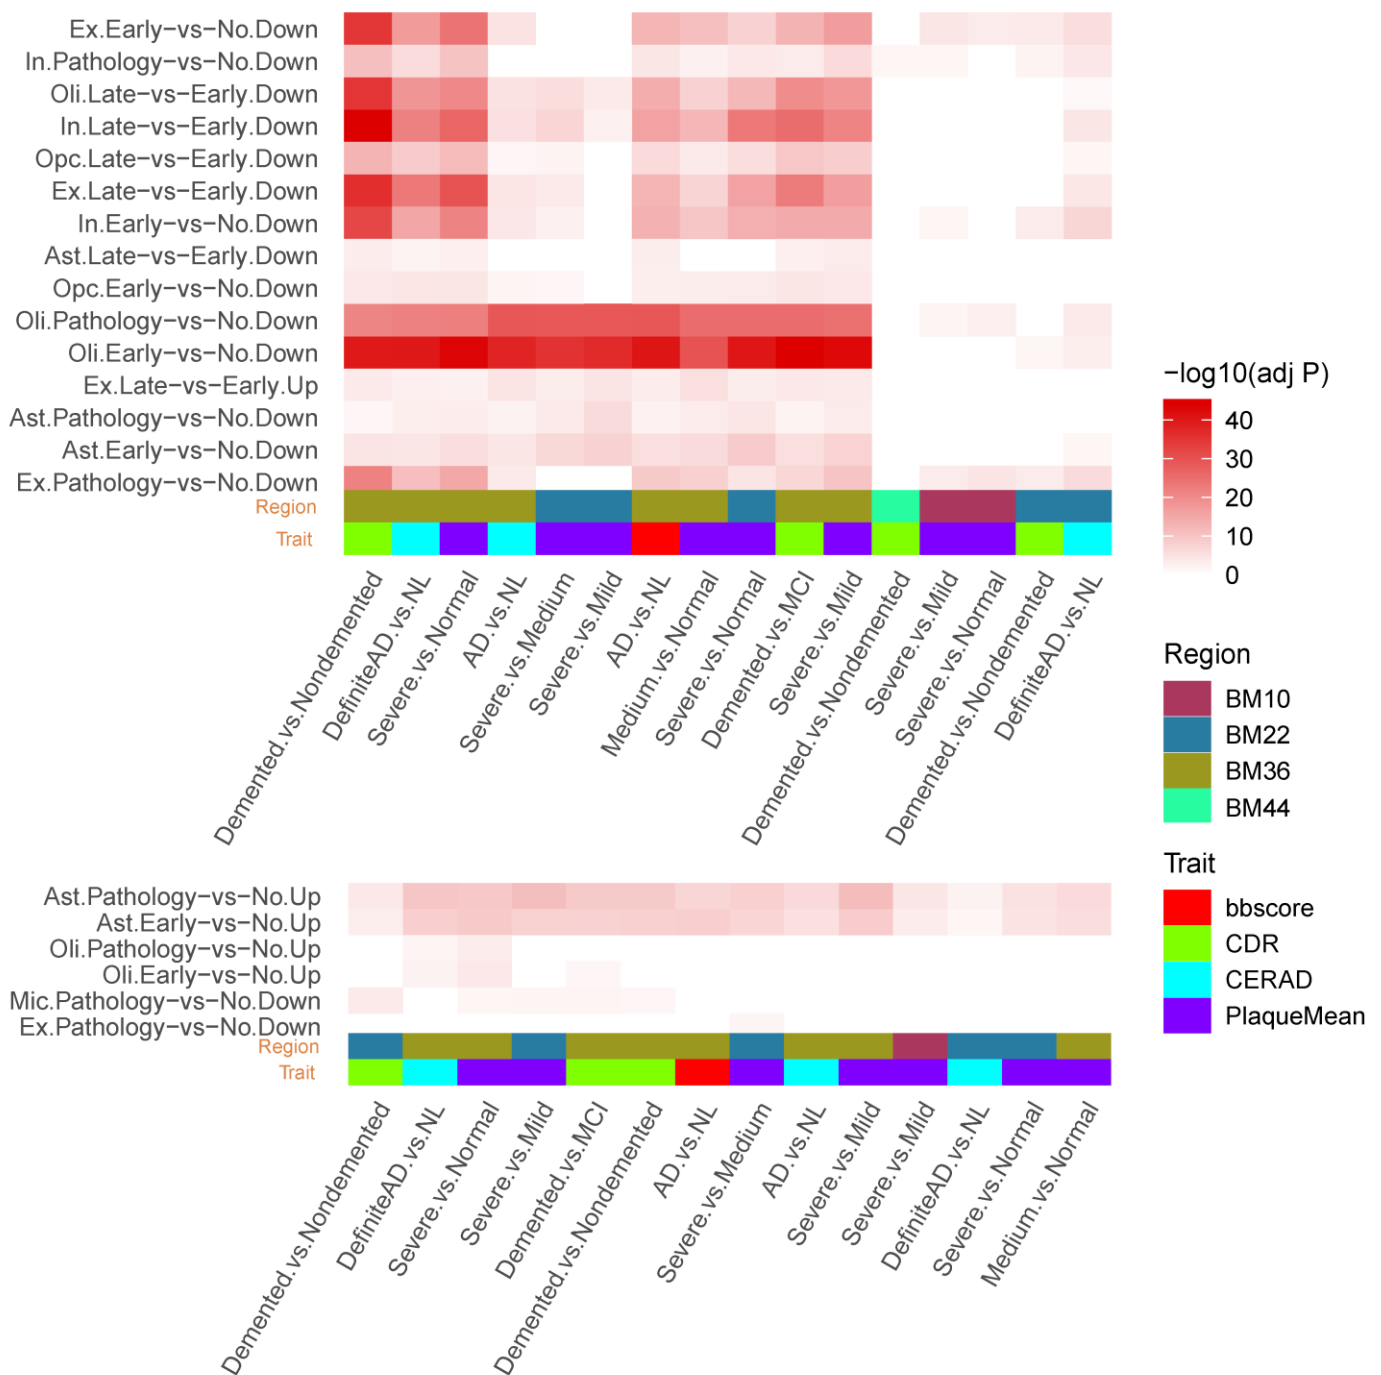

**Fig. S5. Preservation of differential expression signatures in a public single-nucleus RNA-seq (snRNA-seq) analysis of AD and control brains, related to STAR Methods.** The present down-regulated (top) or up-regulated (bottom) DEGs were enriched in cell type-specific AD signatures detected by snRNA-seq (Mathys et al 2019). Columns denote the present DEG signatures identified from 4 brain regions regarding 4 different cognitive/neuropathological traits and rows denote cell type-specific DEGs. The snRNA-seq cell type-specific DEGs are denoted in a format of “cell.contrast.direction”, where cell is either Ex (excitatory neurons), In (inhibitory neurons), Oli (oligodendrocytes), Opc (oligodendrocyte progenitor cells), Ast (astrocytes), or Mic (microglia), contrast is either Early-vs-No (early pathology versus no pathology), Late-vs-Early (late pathology versus early pathology), or Pathology-vs-No (early and late pathology combined versus no pathology), and direction is either Down (down-regulation) or Up (up-regulation).



**Fig. S6. GO biological process (BP) hierarchy enrichment reveals distinct functional roles that the top-ranked neuronal/synaptic modules may play, related to Figure 2.** Each node denotes a GO/BP term, with a pie-chart displaying the  $-\log_{10}$ (adjusted P value) of the FET enrichment for the 4 top-ranked neuronal/synaptic modules (i.e. M6, M62, M64 and M65). Arrows denote the direction from a parent term to a child term. The GO hierarchy was extracted from the R/Bioconductor package GO.db and the GO/BP annotation gene sets were obtained from the R/Bioconductor package org.Hs.eg.db. The three subplots A-C group terms in relation to synaptic function, neuronal development and transportation, respectively.



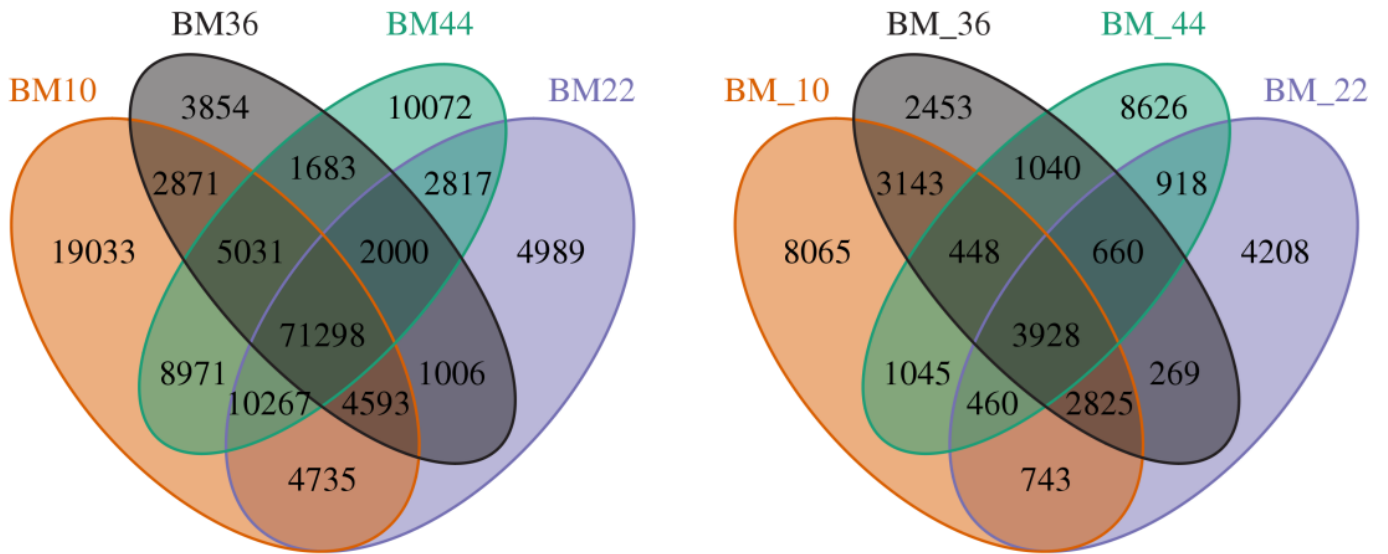

**Fig. S7. eQTLs are shared among different regions, related to STAR Methods.** Venn-diagram showing the overlap among *cis*-eQTLs (left) and *trans*-eQTLs (right).

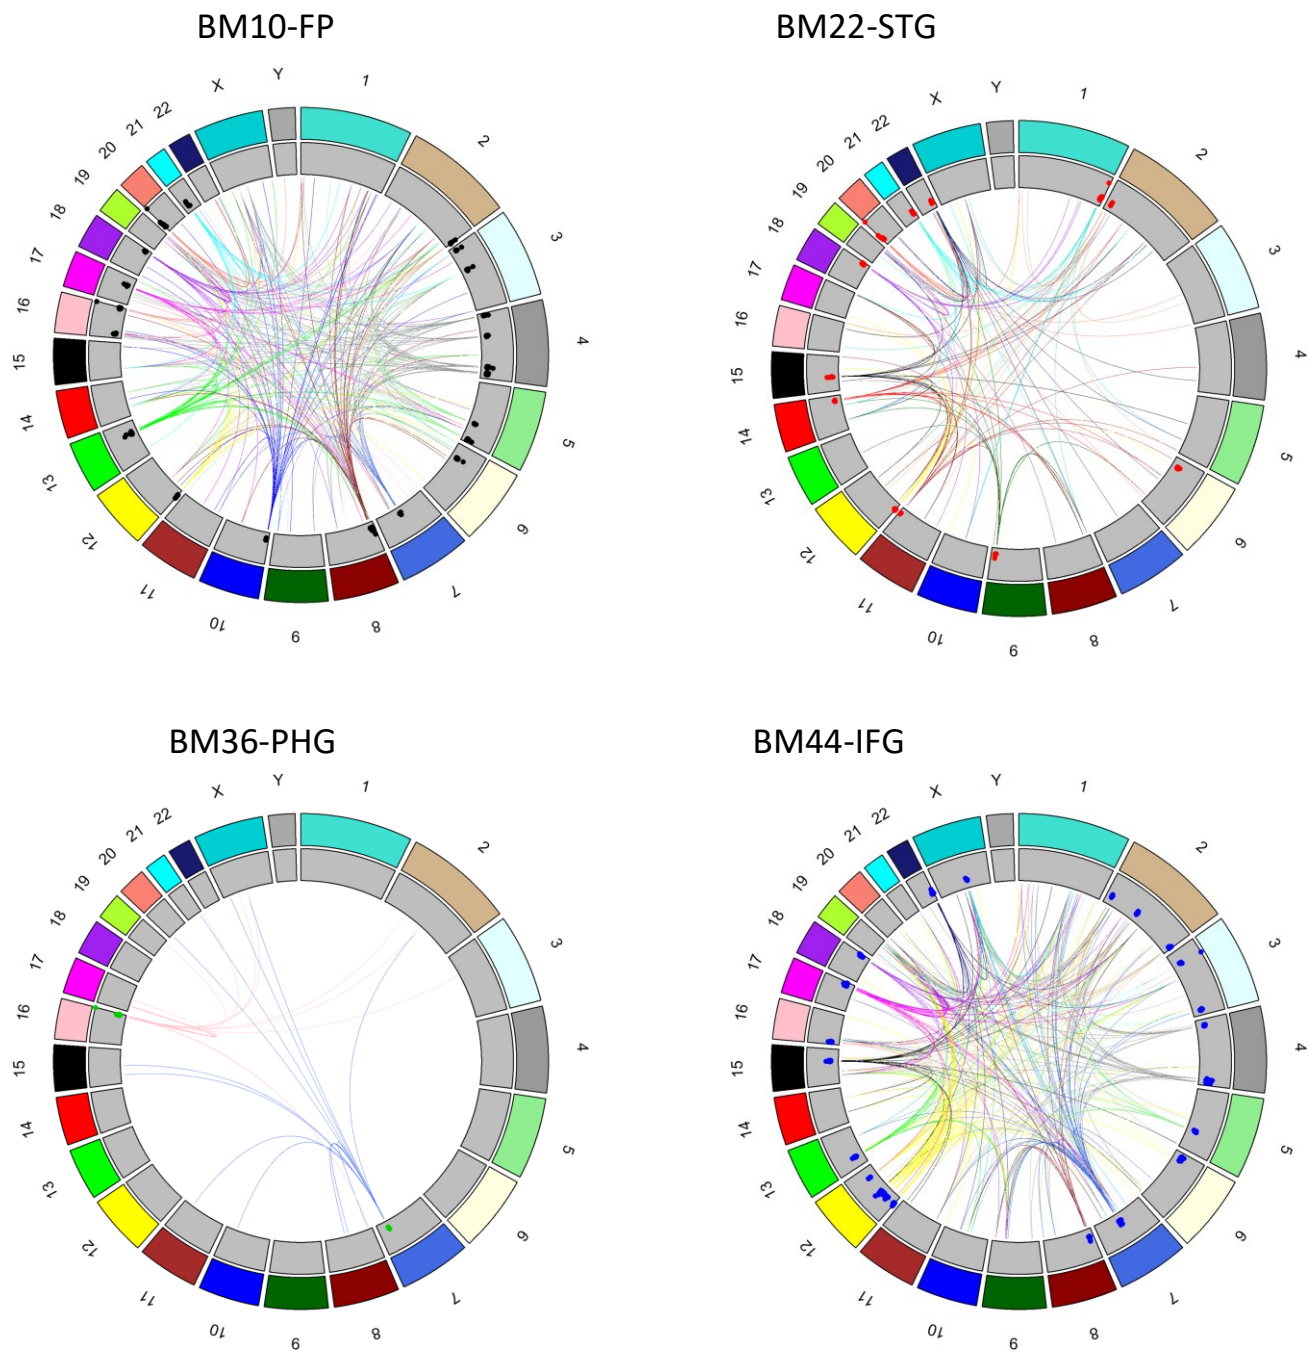

**Fig. S8. *Trans*-eQTL hotspots identified in the 4 brain regions, related to STAR Methods.** The outermost first track shows the chromosome id. The second track denotes the color coding of the chromosomes. The dots in the third track denote the  $-\log_{10}(P)$  value of the *trans*-eQTL associations for the hotspots. Links in the middle connect the hotspots to the associated *trans*-eGenes. Links are colored by the chromosomal origination of the *trans*-eQTL hotspots.

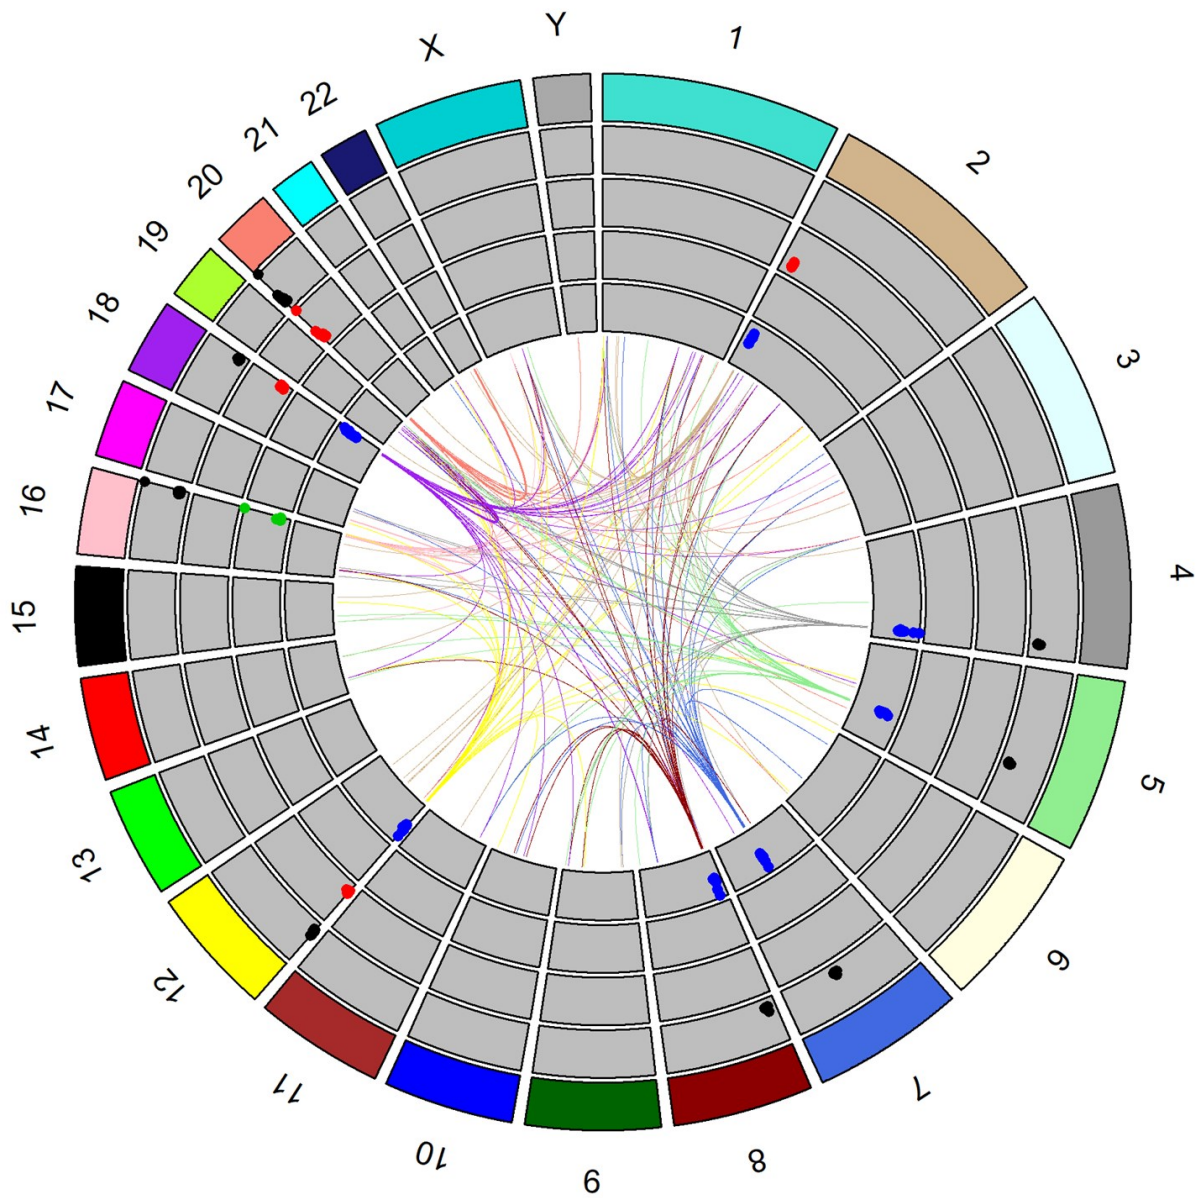

**Fig. S9. *Trans*-eQTL hotspots shared by at least two brain regions, related to STAR Methods.** The outermost first track shows the chromosome id. The second track denotes the color coding of the chromosomes. The dots in the third to sixth tracks denote the  $-\log_{10}(P \text{ value})$  of the *trans*-eQTL associations for the hotspots in brain region BM10-FP, BM22-STG, BM36-PHG and BM44-IFG, respectively. Links in the middle connect the hotspots to the associated *trans*-eGenes. Links are colored by the chromosomal origination of the *trans*-eQTL hotspots.

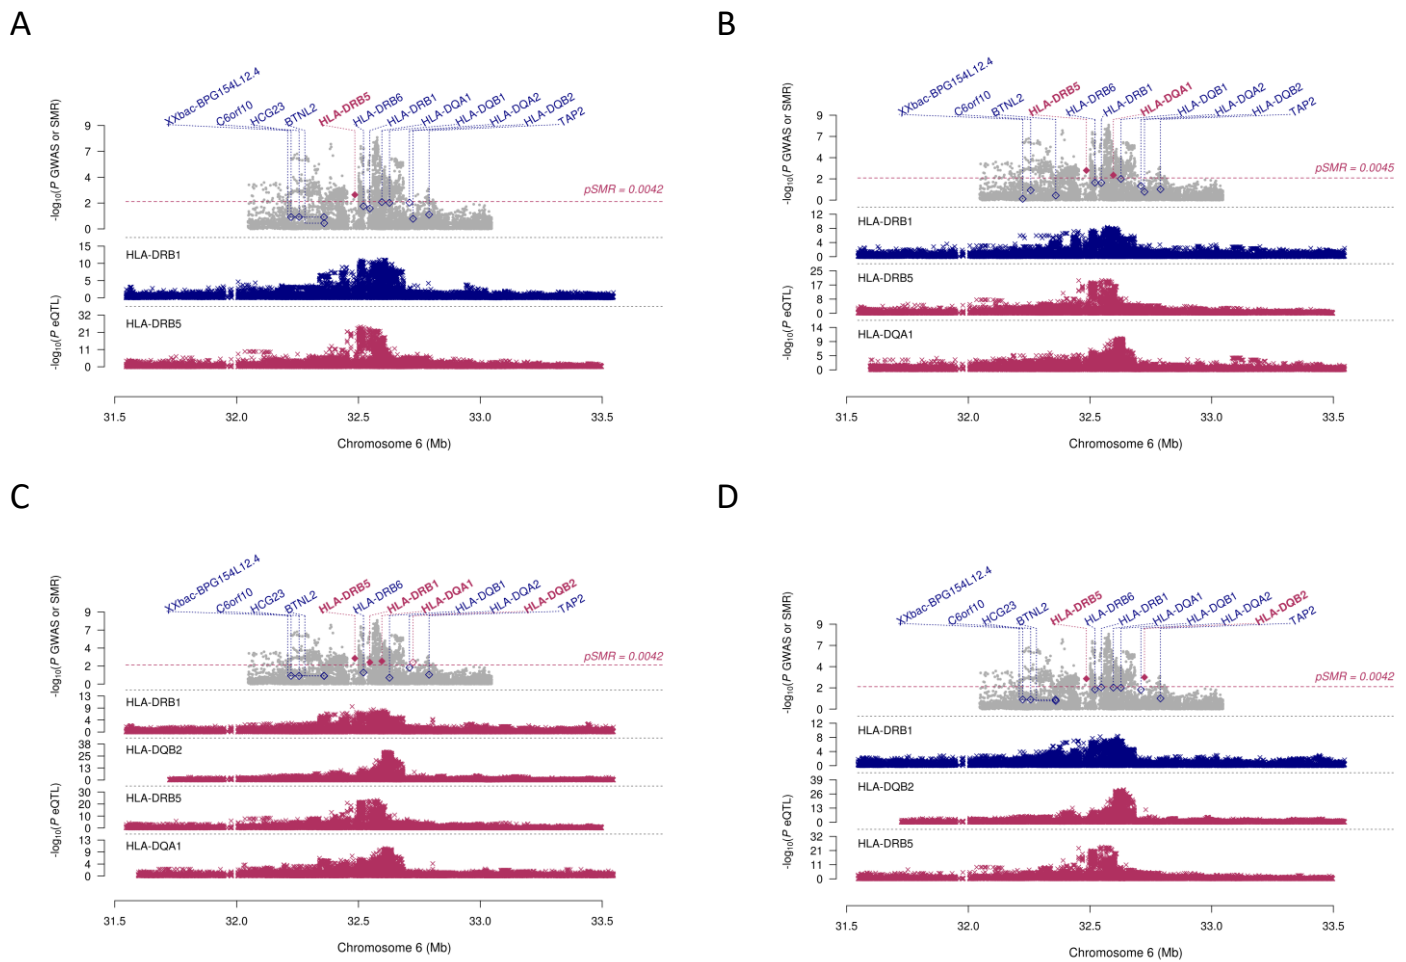

**Fig. S10. Summary data-based Mendelian randomization (SMR) analysis at the *HLA-DRB1/HLA-DRB5* locus based on Kunkle et al 2019 AD GWAS summary statistics, related to STAR Methods. A-D show the SMR analysis results integrating IGAP AD GWAS with eQTLs derived from brain regions BM10, BM22, BM36 and BM44, accordingly. For the top panel in each plot, dots represent the P values for SNPs from the IGAP AD GWAS analysis and diamonds represent the P values for genes from the SMR test. Filled diamonds highlight the genes surpassing the HEIDI test ( $P \geq 0.05$ ). The genes with cis-eQTLs are listed on the top. Genes surpassing the SMR test were highlighted in red. Dashed line shows the region-specific Bonferroni corrected P value significance threshold of the SMR test controlling for the number of genes examined. Bottom plot shows the eQTL P values of SNPs from the present data.**

A

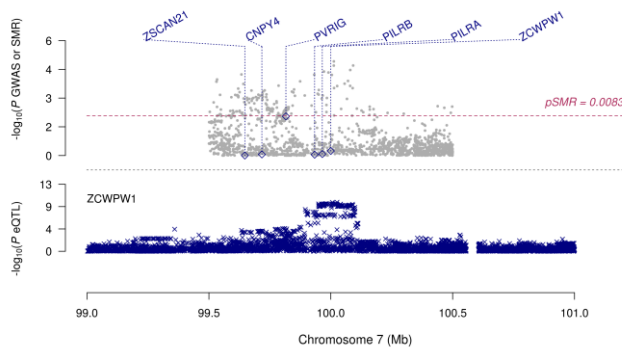

B

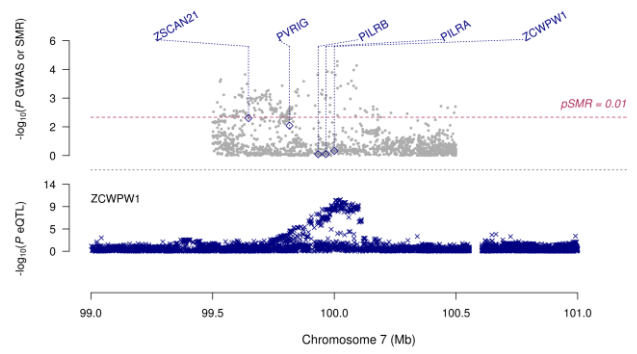

C

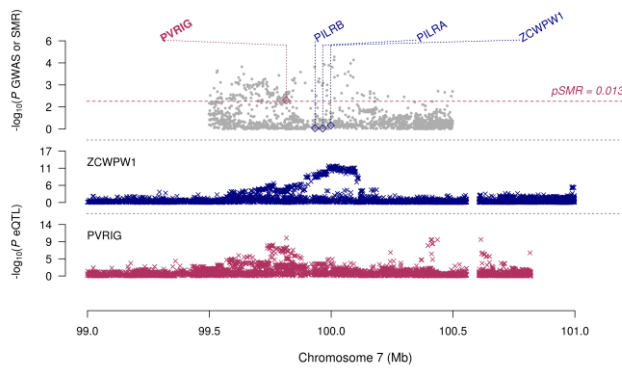

D

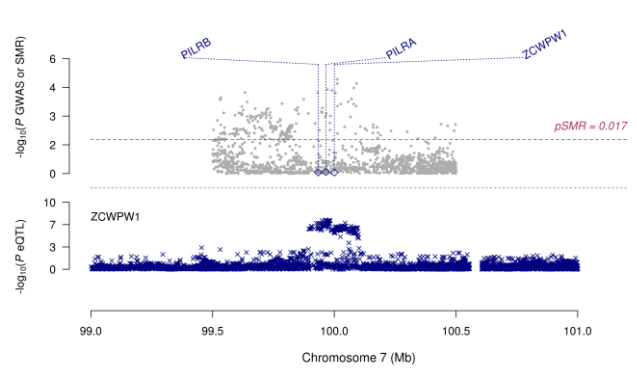

**Fig. S11. SMR analysis at the *ZCWPW1* locus based on Kunkle et al 2019 AD GWAS summary statistics, related to STAR Methods. A-D** show the results from BM10, BM22, BM36 and BM44, accordingly. Figure legend is the same as in Fig S11.

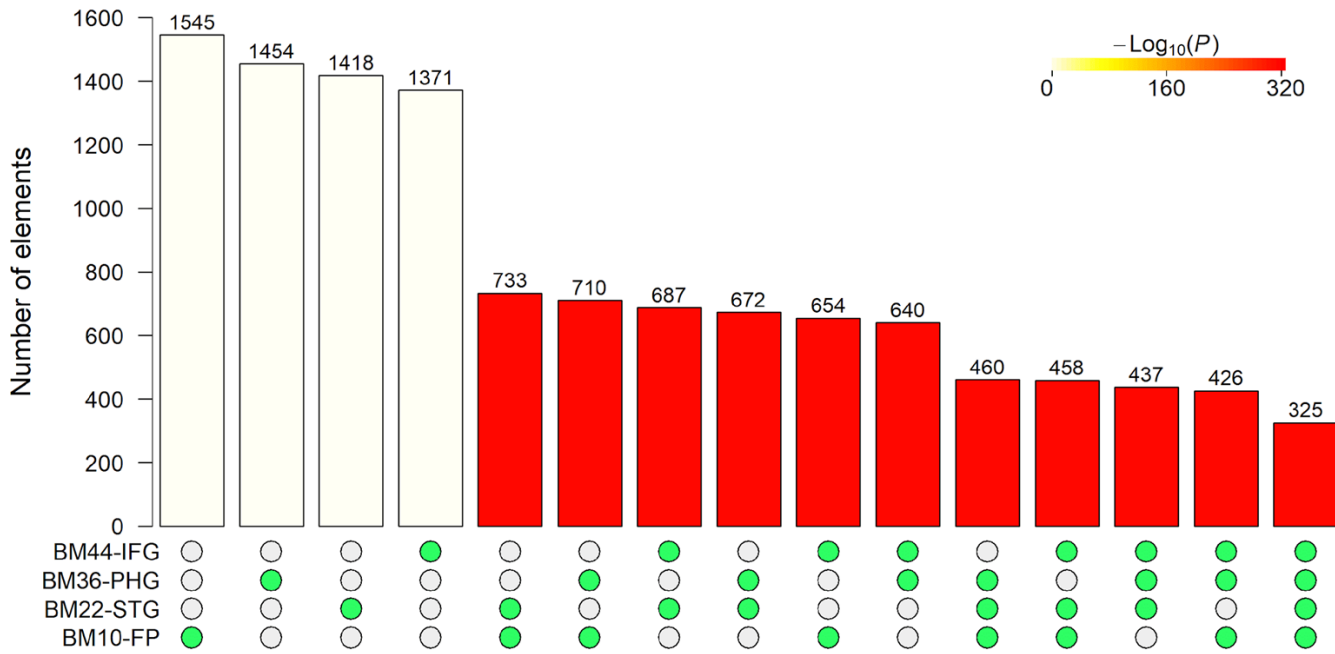

**Fig. S12. Bayesian network key drivers are strongly shared among brain region-specific networks, related to STAR Methods.** The bar height denotes the number of key drivers overlapping in a given comparison as specified by the green circles underneath. The overlap size is also shown above the bar. The color denotes the P value significance of the overlap size.

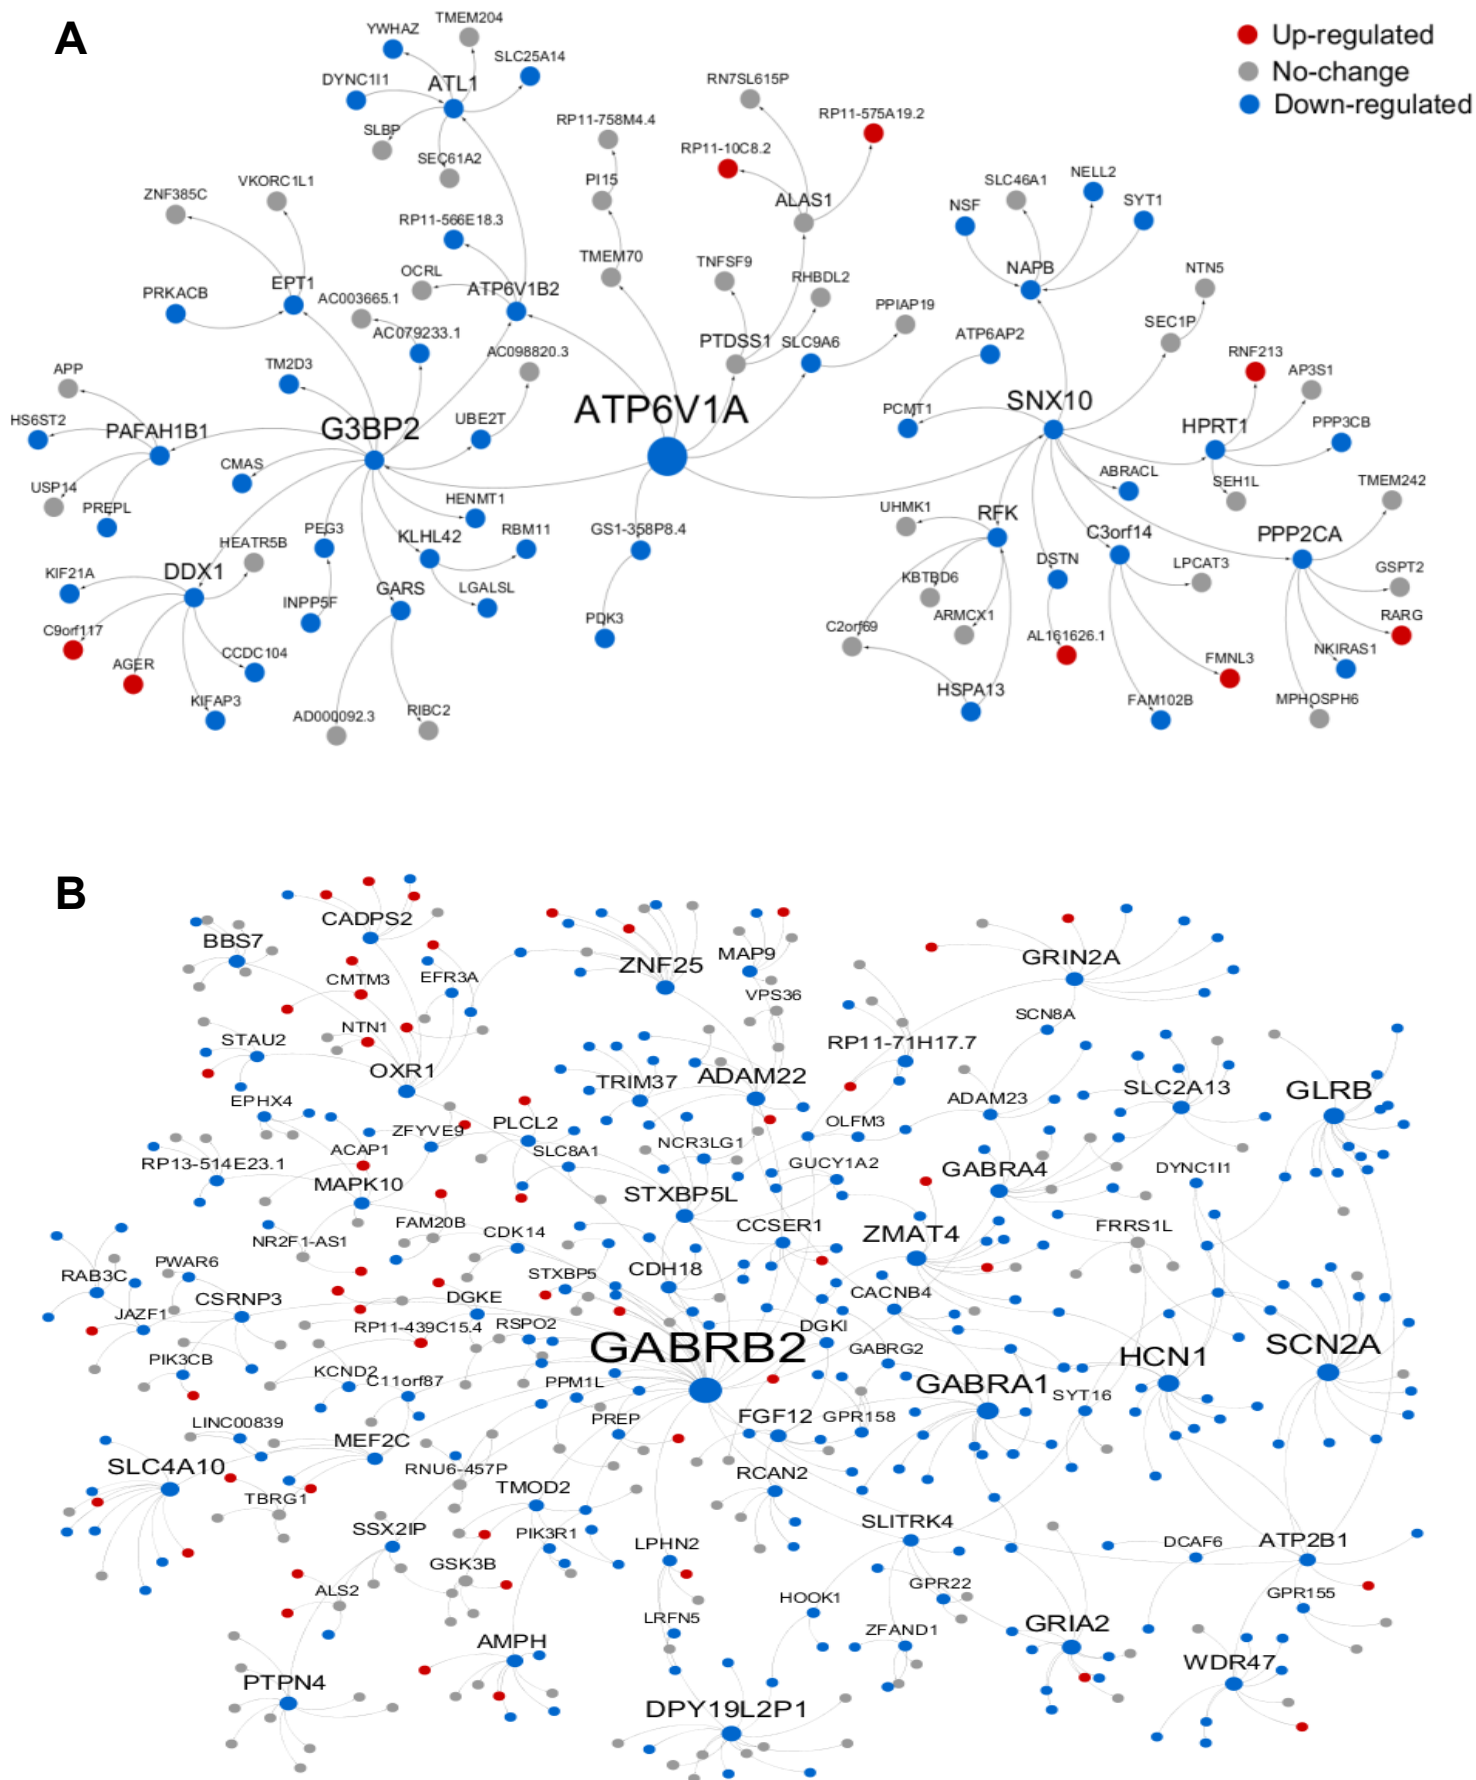

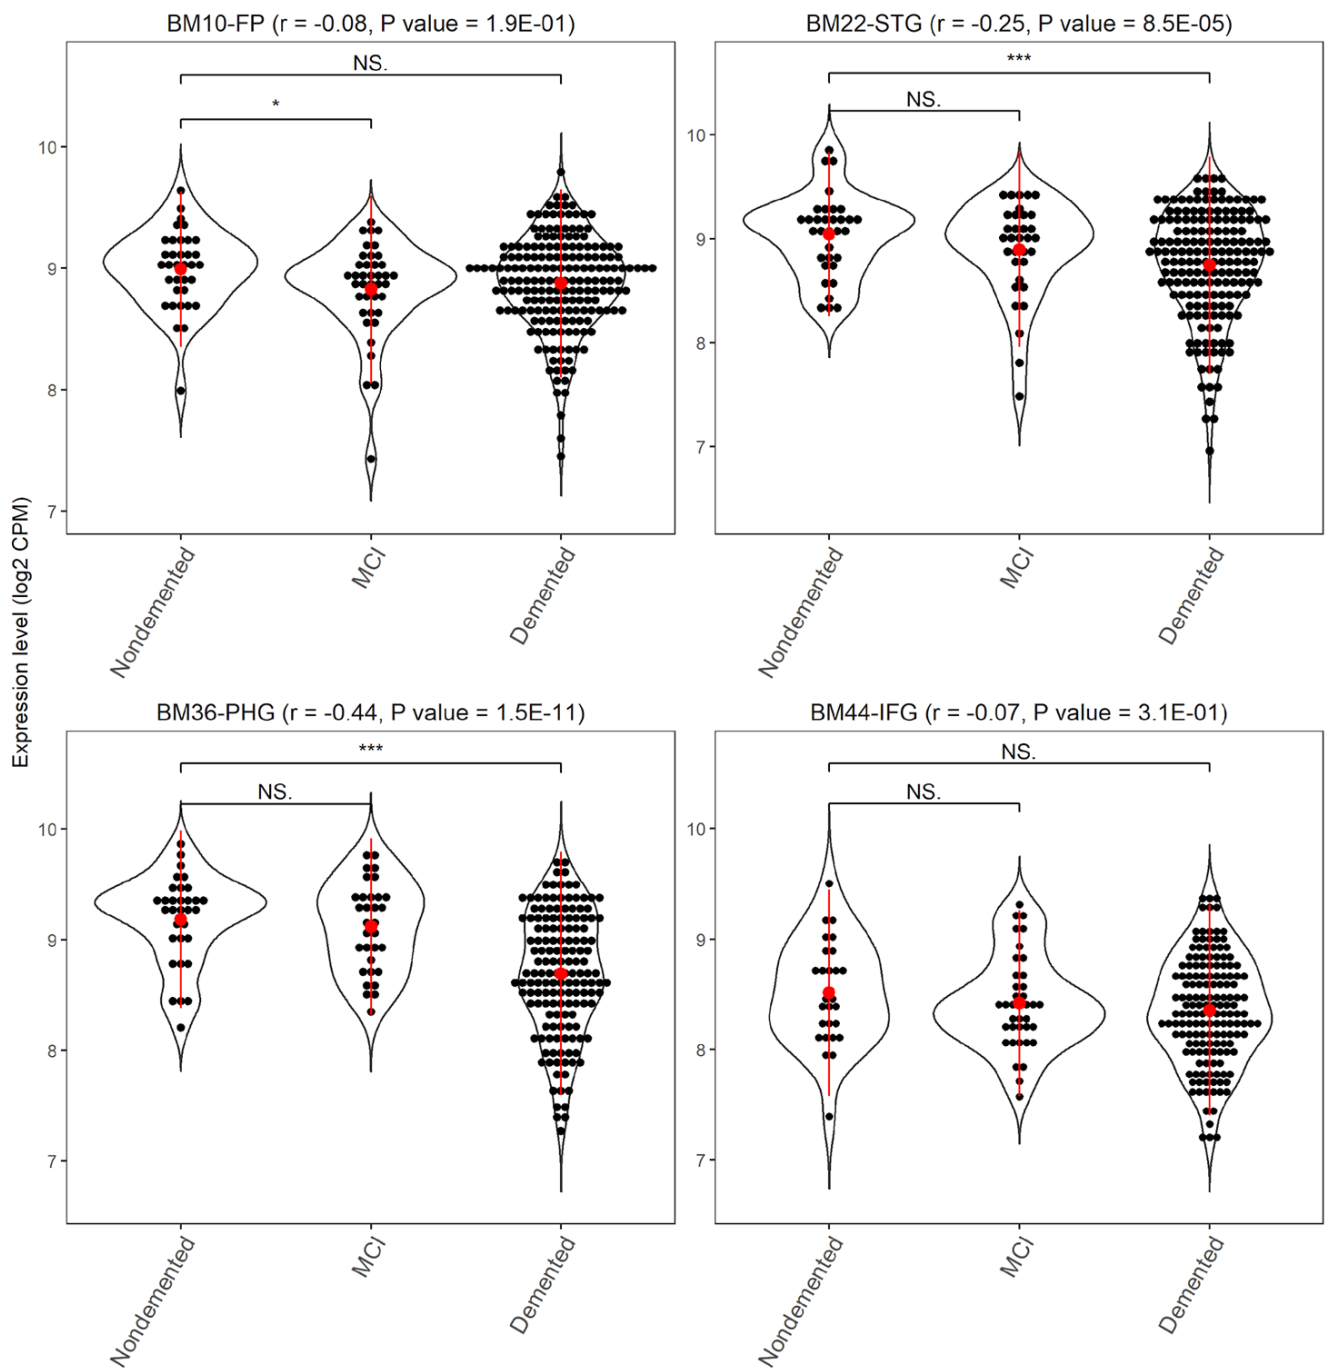

**Fig. S14. *ATP6V1A* is down-regulated in demented patients in multiple brain regions, related to Figure 3.** Significance bar represents t-test P value. \* $p < 0.05$ ; \*\*\* $p < 0.001$ , NS., no significance. Correlation coefficient (r) and P value of the Spearman correlation between *ATP6V1A* expression and clinical trait CDR are also shown in the top of each sub-plot.



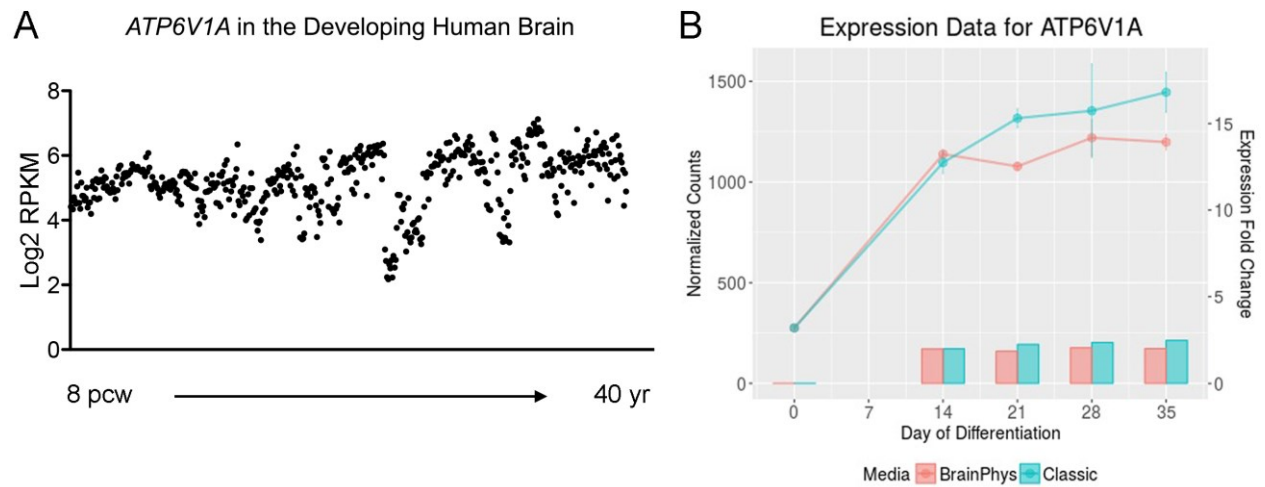

**Fig. S15. *ATP6V1A* is robustly expressed among different nerve cells, related to Figure 4.** (A) A scatter plot represents log2 RPKM (reads per kilobase per million) expression for *ATP6V1A* gene in the developing brain from age 8 pcw to 40 yrs (Miller et al 2014, available from <https://www.brainspan.org/rnaseq/search/index.html>). (B) *ATP6V1A* visualization in human iPSC-derived neurons during *NGN2*-induction (Tian et al. 2019, available from [https://ineuronrnaseq.shinyapps.io/rnaseq\\_app/](https://ineuronrnaseq.shinyapps.io/rnaseq_app/)).

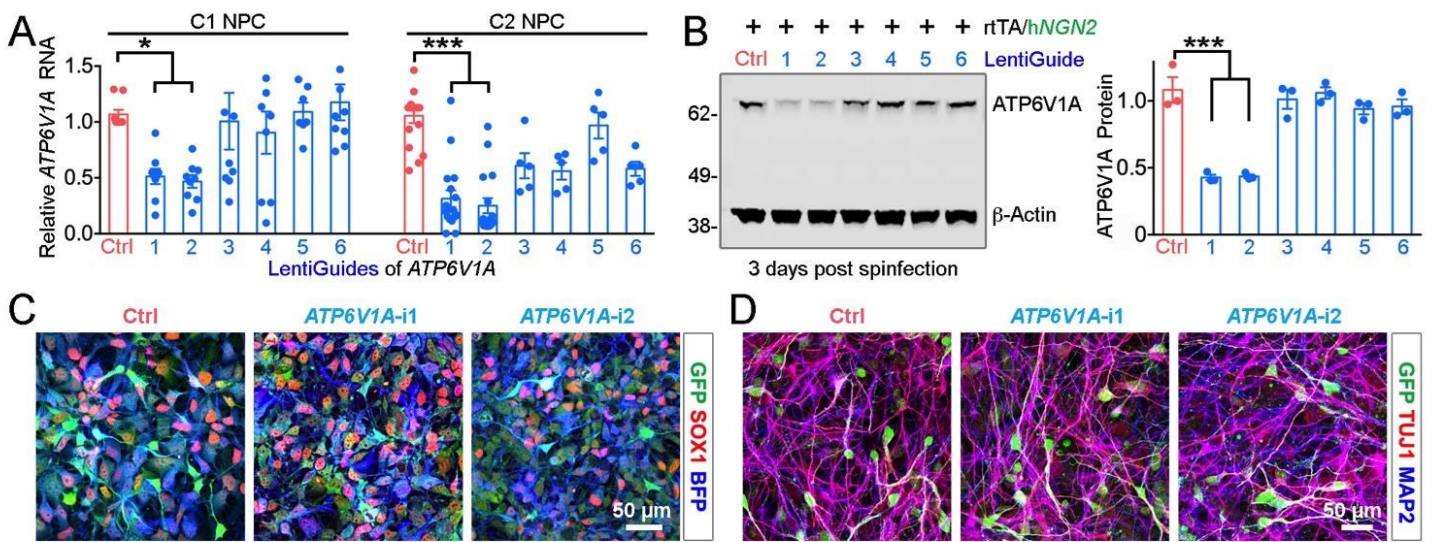

**Fig. S16. Evaluation of six gRNAs for repression of *ATP6V1A* in hiPSC-derived NPCs and *NGN2*-neurons, related to Figure 4.** A-B, Normalized relative RNA and protein levels (compared to an empty backbone control) following transduction of dCas9-KRAB NPCs with lentivirus-expressing gRNA targeting *ATP6V1A*. Red: control. Blue: CRISPRi. ANOVA; \* $p < 0.05$  and \*\*\* $p < 0.001$ ; Error bars represent SE. C-D, *ATP6V1A* CRISPRi does not affect the neuronal differentiation of NPCs to *NGN2*-neurons. SOX1 is a neural stem cell marker (red); TUJ1 (red) and MAP2 (blue) are pan-neuronal markers. Bars, 50  $\mu$ m.

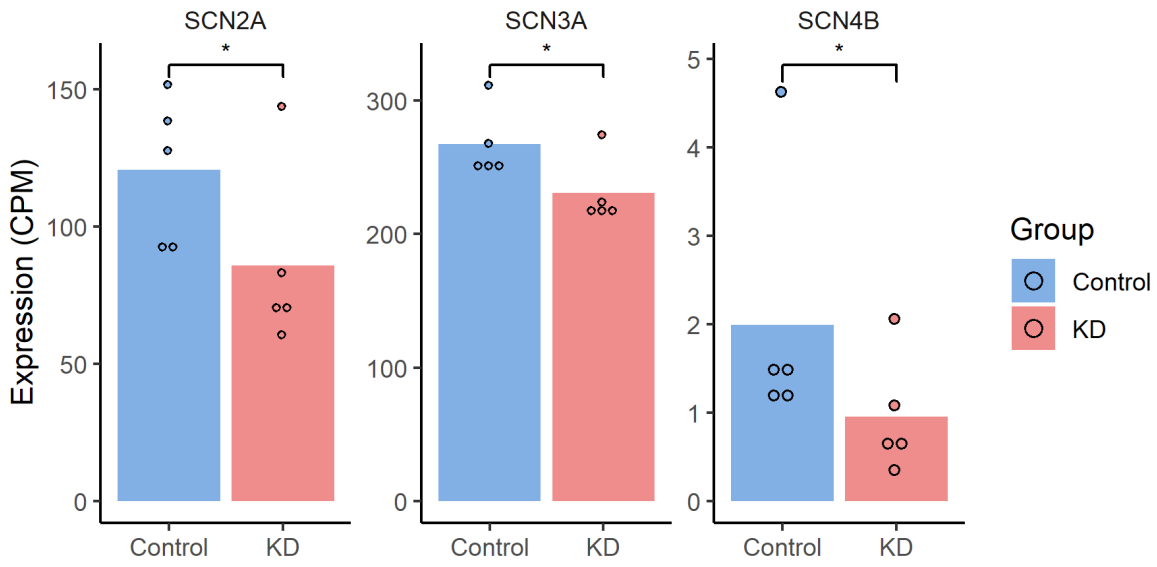

**Fig. S17. RNA-seq revealed reduced mRNA expression of voltage gated sodium channel subunits *SCN3A*, *SCN2A*, and *SCN4B* in *ATP6V1A* KD *NGN2*-neurons, related to Figure 4. \*p < 0.05 by Student's t-test.**

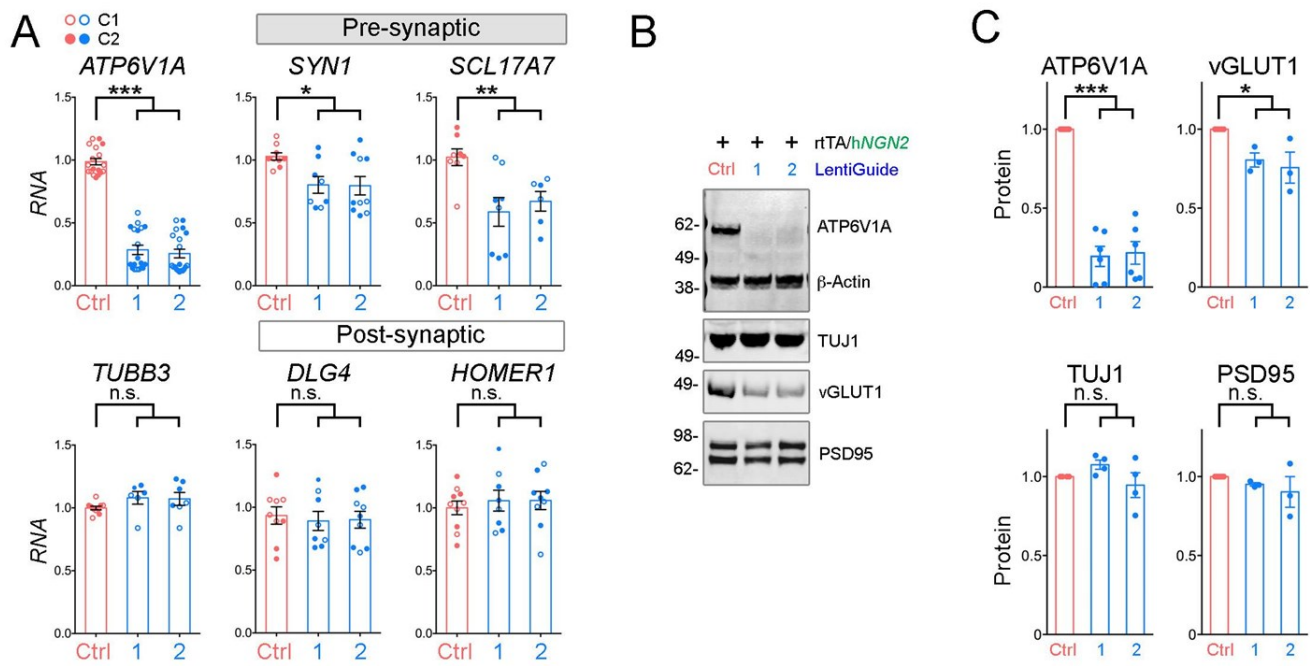

**Fig. S18. Expression of synaptic components in hiPSC-derived NGN2-neurons, related to Figure 4. A,** qRT-PCR analysis of expression of *ATP6V1A*, *TUBB3*, *SYN1*, *SCL17A7*, *DLG4* and *HOMER1* genes. n = 6-20 replicates. **B-C,** Western blot analysis and quantification of ATP6V1A,  $\beta$ -Actin, TUJ1, vGLUT1 and HOMER1 protein levels. Data represent the mean, n = 3 independent experiments. ANOVA; \*p < 0.05; \*\*p < 0.01; \*\*\*p < 0.001; n.s., no significance; Error bars represent SE.

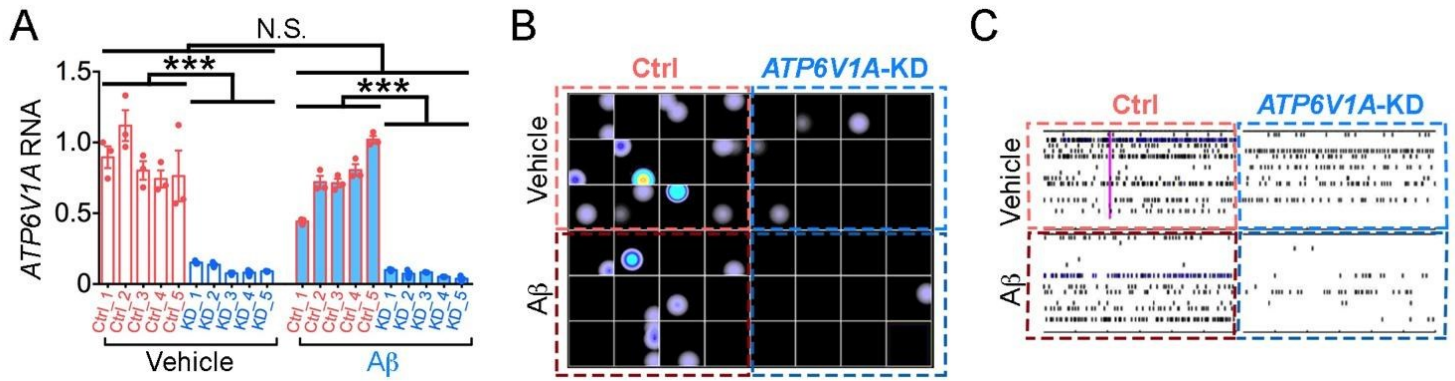

**Fig. S19. MEA arrays in *ATP6V1A*-deficient *NGN2*-neurons with or without exposure to A $\beta$ , related to Figure 4.** **A**, *ATP6V1A* RNA levels across different samples. n = 3 replicates. ANOVA; \*\*\*p < 0.001; N.S., no significance; Error bars represent SE. **B**, Representative heat map recording of a CytoView MEA 48 plate. **C**, Representative raster plots of the spike events over 10 minutes of day 21 (D21) *NGN2*-neurons.

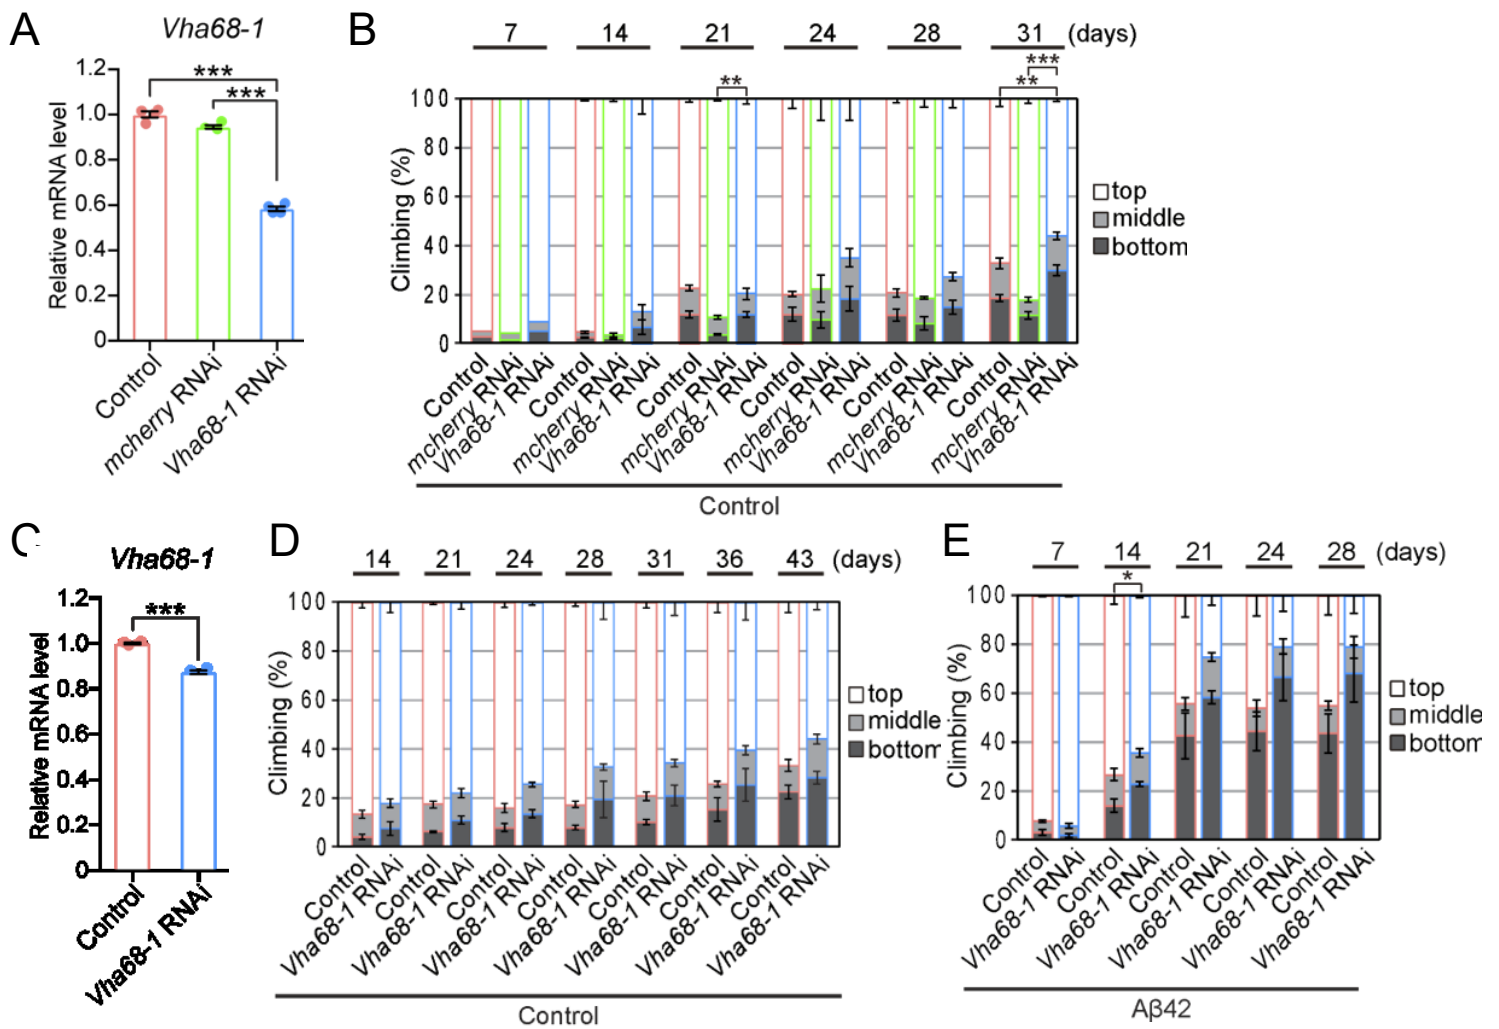

**Fig. S20. Neuronal knockdown of *Vha68-1* exacerbates behavioral deficits caused by overexpression of A $\beta$ 42 peptide, related to Figure 4.** **A**, mRNA expression levels of *Vha68-1* in heads of flies expressing RNAi targeting *Vha68-1* (line #50726) were analyzed by qRT-PCR.  $n = 4$ ,  $***p < 0.001$  by Student's t-test. **B**, Neuronal knockdown of *Vha68-1* (line #50726) by itself caused modest decline in climbing ability in aged flies. Average percentages of flies that climbed to the top (white), climbed to the middle (light gray), or stayed at the bottom (dark gray) of the vials. Percentages of flies that stayed at the bottom were subjected to statistical analyses.  $n = 5$  independent experiments except for day 7 when  $n = 2$ ,  $**p < 0.01$  and  $***p < 0.001$  by Student's t-test. **C**, mRNA levels of *Vha68-1* in heads of flies expressing RNAi targeting *Vha68-1* (line #42888) were analyzed by qRT-PCR.  $n = 4$ ,  $***p < 0.001$  by Student's t-test. **D-E**, Neuronal knockdown of *Vha68-1* (line #42888) did not alter climbing ability in control flies (**D**) but slightly enhanced locomotor deficits in A $\beta$ 42 flies (**E**). Percentages of flies that stayed at the bottom were subjected to statistical analyses.  $n = 5$  independent experiments,  $**p < 0.01$  and  $***p < 0.001$  by Student's t-test. The genotypes of the flies were: **A** and **B**, (Control): *elav-GAL4/Y; +/CyO*, (*mcherry* RNAi): *elav-GAL4/Y; +/CyO; UAS-mcherry RNAi/+*, (*Vha68-1* RNAi): *elav-GAL4/Y; +/CyO; UAS-Vha68-1 RNAi* (line #50726)/+. **C** and **E**, (Control): *elav-GAL4/Y*, (*Vha68-1* RNAi): *elav-GAL4/Y; UAS-Vha68-1 RNAi* (line #42888)/+. **D**, (A $\beta$ 42 and Control): *elav-GAL4/Y; UAS-A $\beta$ 42/+*; and (A $\beta$ 42 and *Vha68-1* RNAi): *elav-GAL4/Y; UAS-A $\beta$ 42/UAS-Vha68-1 RNAi* (line #42888).

A

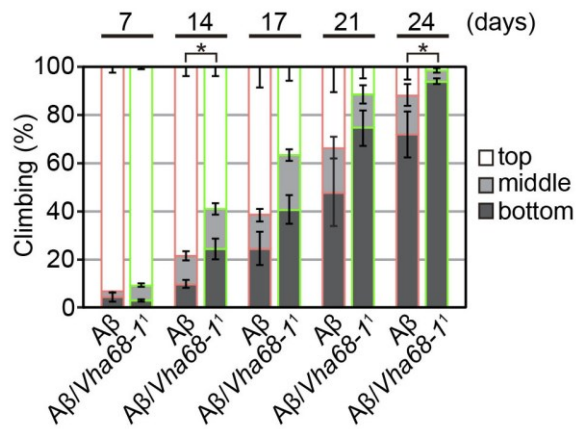

B

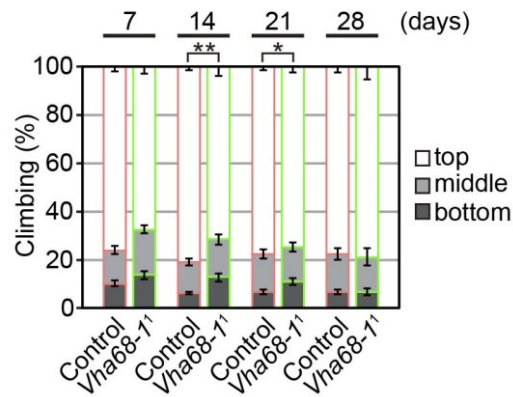

C

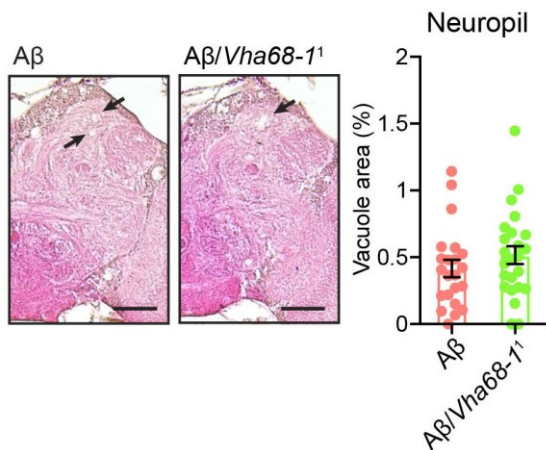

**Fig. S21 A single nucleotide mutation of *Vha68-1* worsens Aβ<sub>42</sub>-induced climbing defects, related to Figure 4.** (A) A heterozygous mutation of *Vha68-1* worsened locomotor defects caused by Aβ<sub>42</sub> as revealed by climbing assay. (B) A heterozygous mutation of *Vha68-1* by itself did not cause obvious climbing defects. Percentages of flies that stayed at the bottom were subjected to statistical analyses.  $n = 3-4$  independent experiments.  $*p < 0.05$  and  $**p < 0.01$  by Student's *t*-test. (C) A heterozygous mutation of *Vha68-1* slightly worsened neurodegeneration in the neuropil region in Aβ<sub>42</sub> fly brains, but the difference did not reach statistical significance. Representative images show the central neuropil in the paraffin-embedded brain section with hematoxylin and eosin (HE) staining from 24-day-old flies. Scale bars: 50 μm. Percentages of vacuole areas (indicated by arrows in the images) were subjected to statistical analyses.  $n = 22-24$  hemispheres. The genotypes of the flies were (Aβ): *elav-GAL4/Y;UAS-Aβ<sub>42</sub>/+*, (Aβ/*Vha68-1*): *elav-GAL4/Y;UAS-Aβ<sub>42</sub>/Vha68-1*. (Control): *elav-GAL4/Y* and (*Vha68-1*): *elav-GAL4/Y; Vha68-1/+*.

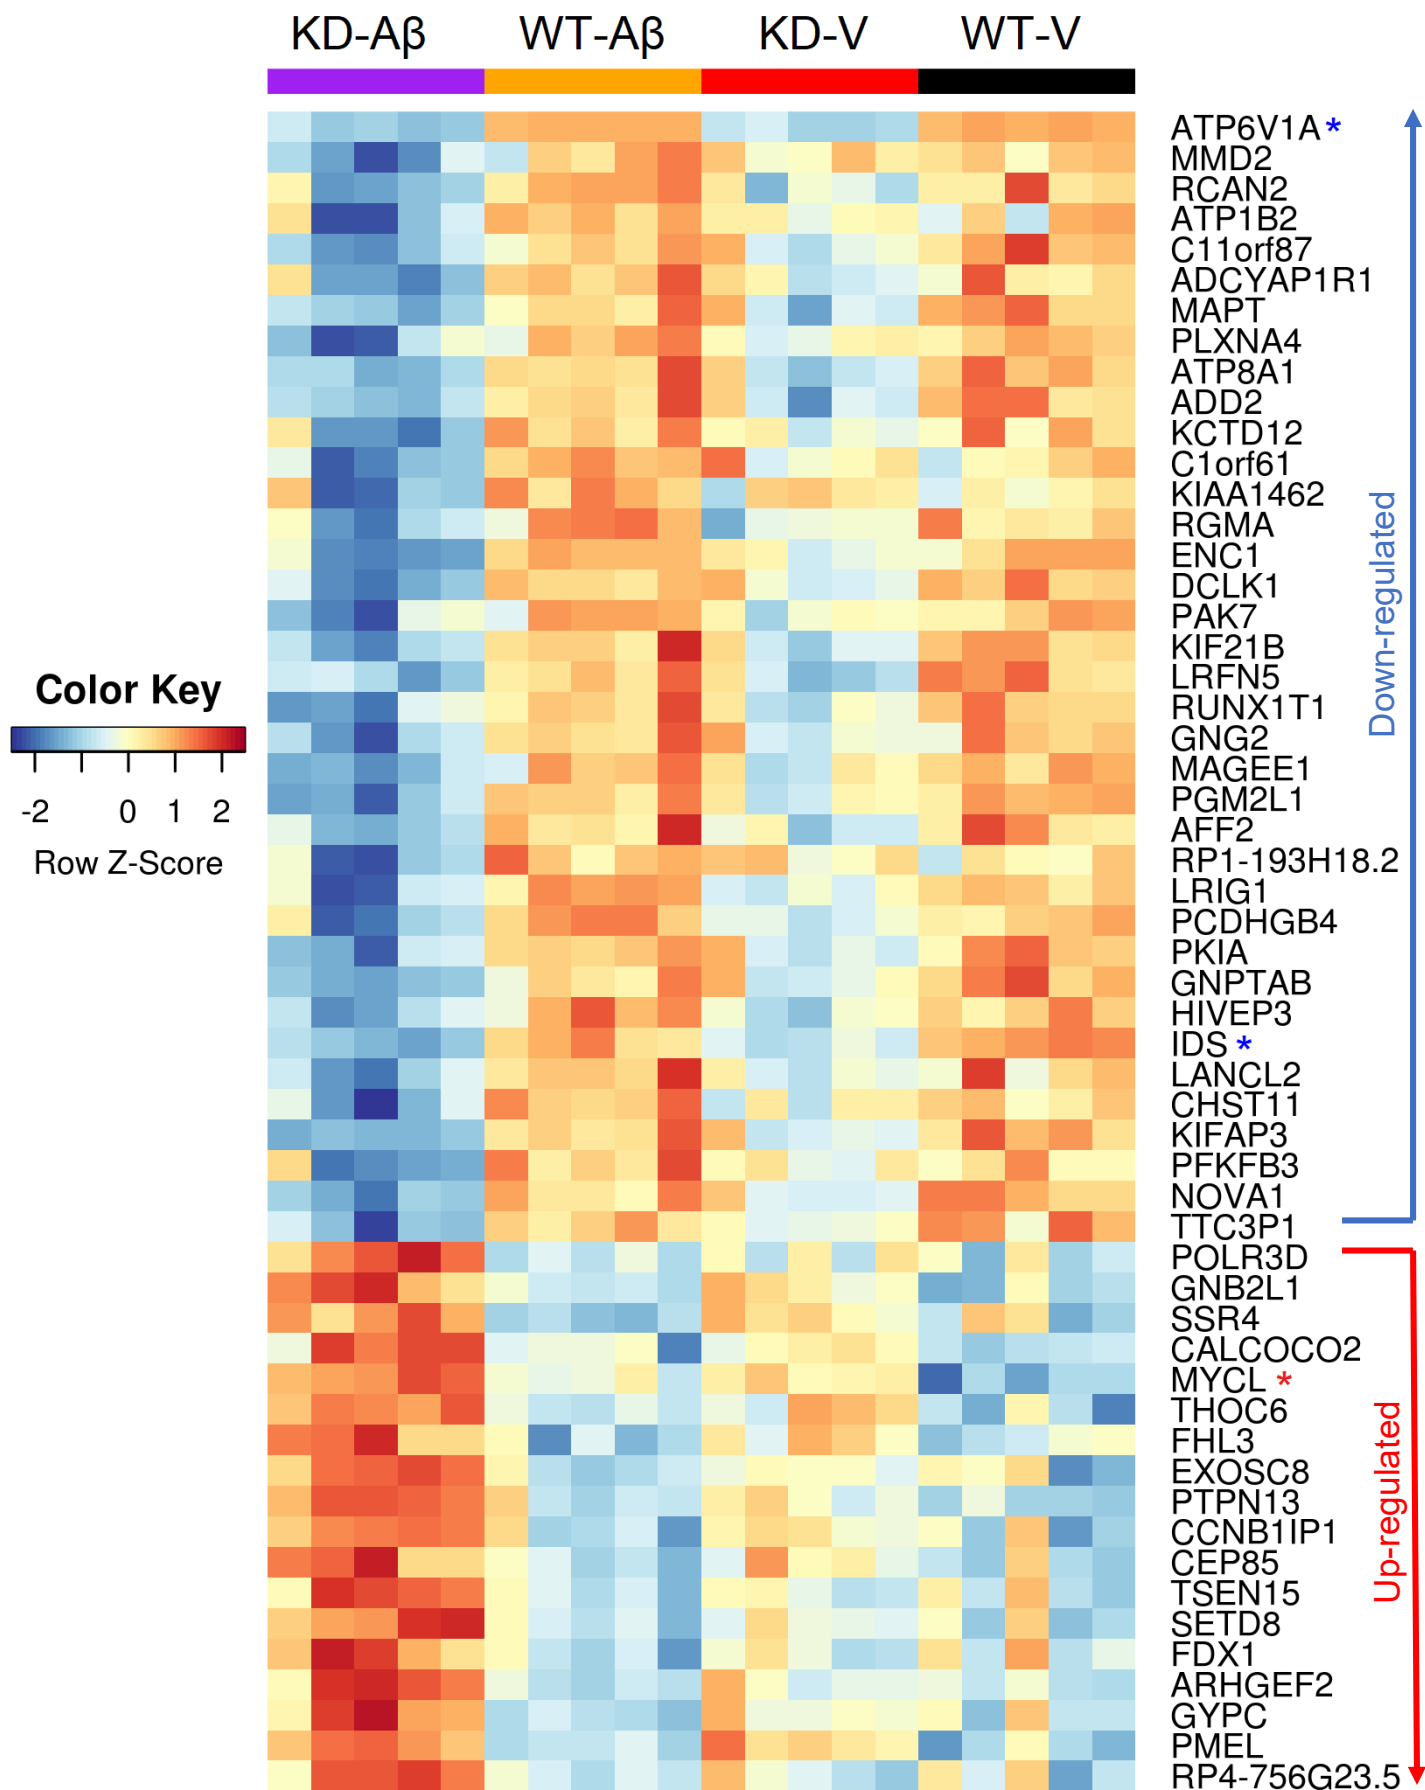

**Fig. S22. Heat-map showing genes significantly differentially expressed between *ATP6V1A* KD and WT in *NGN2*-neurons with or without A $\beta$  treatment, related to Figure 5.** The expression values have been converted to z-score. Blue and red asterisks (\*) denote, respectively, the genes consistently down- or up-regulated irrespective of A $\beta$  treatment (i.e. KD-V vs WT-V and KD-A $\beta$  vs WT-A $\beta$ ). Genes without any symbol annotation are detected only in A $\beta$  treated cells (i.e. KD-A $\beta$  vs WT-A $\beta$ ).



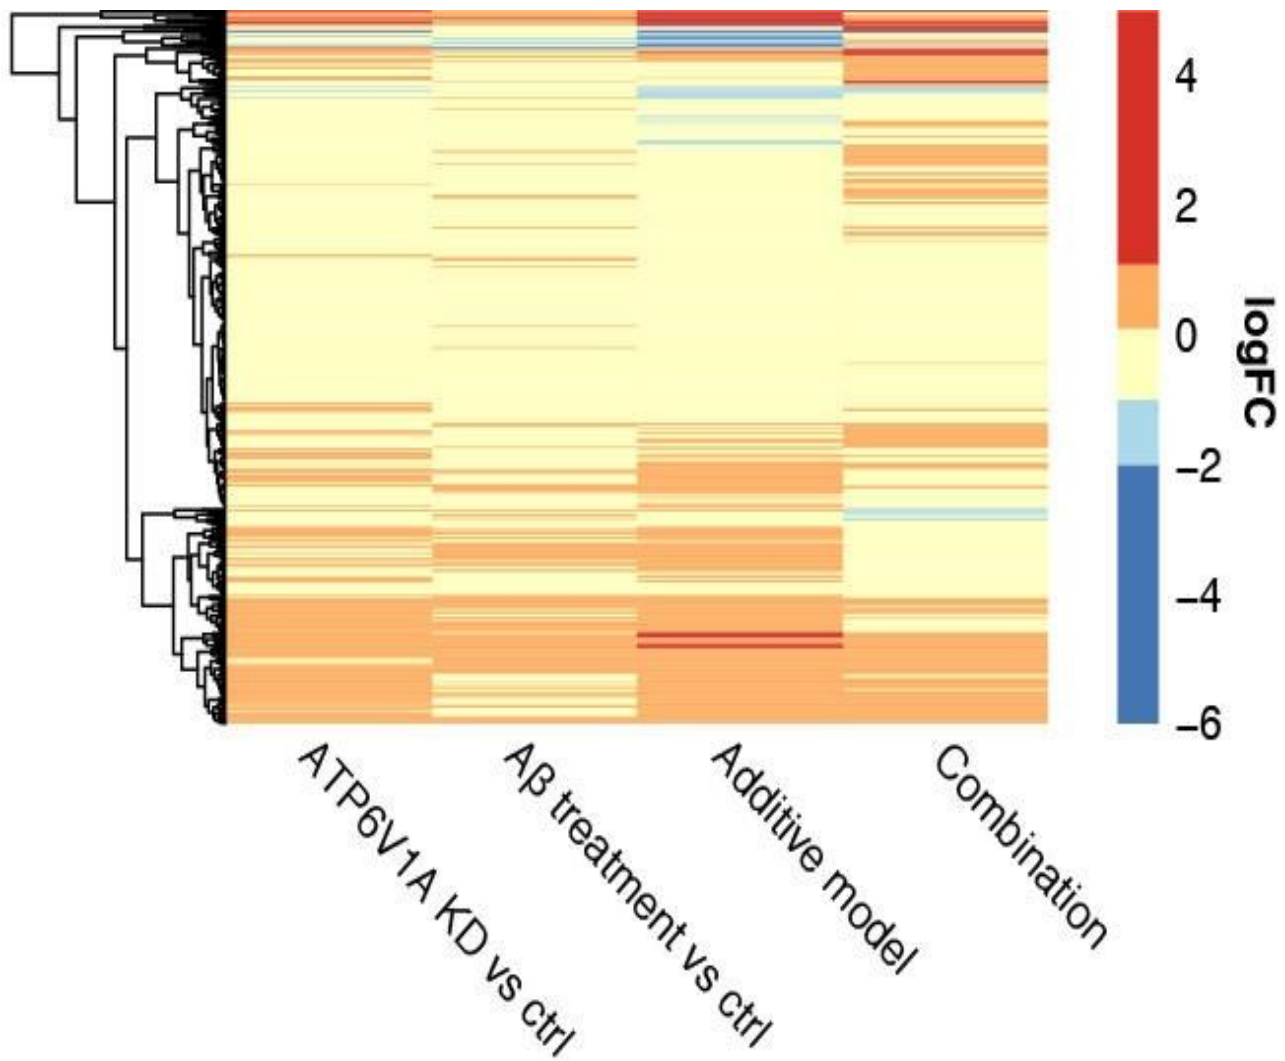

**Fig. S23. Hierarchical clustering of differential expression log<sub>2</sub> fold changes (logFC) for all contrasts in *NGN2*-neurons treated with *ATP6V1A* KD and/or A $\beta$ , related to Figure 5. Genes were pre-aggregated using k-means (k=500). Color gradient represents logFC.**

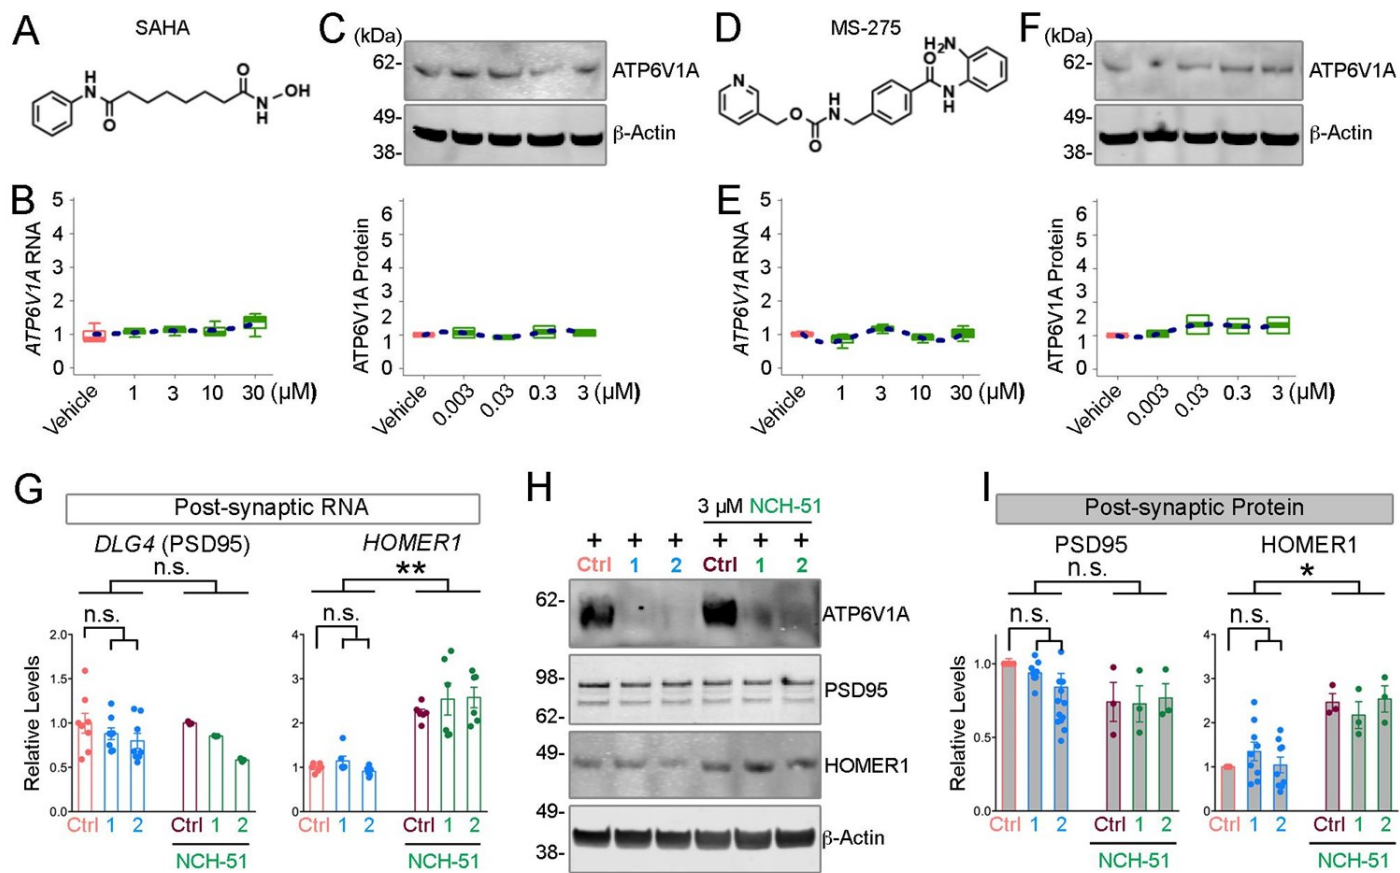

**Fig. S24. Effects of SAHA and MS-275 on *ATP6V1A* mRNA level and NCH-51 on postsynaptic expression in *NGN2*-neurons, related to Figure 6.** A-F, HDAC inhibitors SAHA and MS-275 have no effect on *ATP6V1A* levels. Chemical structures of SAHA (A) and MS-275 (D). Effects of SAHA (B) and MS-275 (E) at 1, 3, 10, 30  $\mu$ M on *ATP6V1A* mRNA levels 24-h after exposure. Effects of SAHA (C) and MS-275 (F) at 0.003, 0.03, 0.3, 3  $\mu$ M on *ATP6V1A* protein level 48-h after exposure, analyzed by western blot.  $\beta$ -Actin is a loading control. A blue dotted line is curve fitted for the set of data points. G, qRT-PCR analysis of *ATP6V1A* and the postsynaptic *PSD95* and *HOMER1* mRNA expression in *NGN2*-neurons in the absence and presence of 3  $\mu$ M NCH-51. n = 3-8 replicates. H-I, Representative western blot and quantitative analysis (n = 3-10 replicates) of *ATP6V1A*, *PSD95* and *HOMER1* protein.  $\beta$ -Actin is a loading control. ANOVA; \*p < 0.05; \*\*p < 0.01; \*\*\*p < 0.001; n.s., no significance; Error bars represent SE.

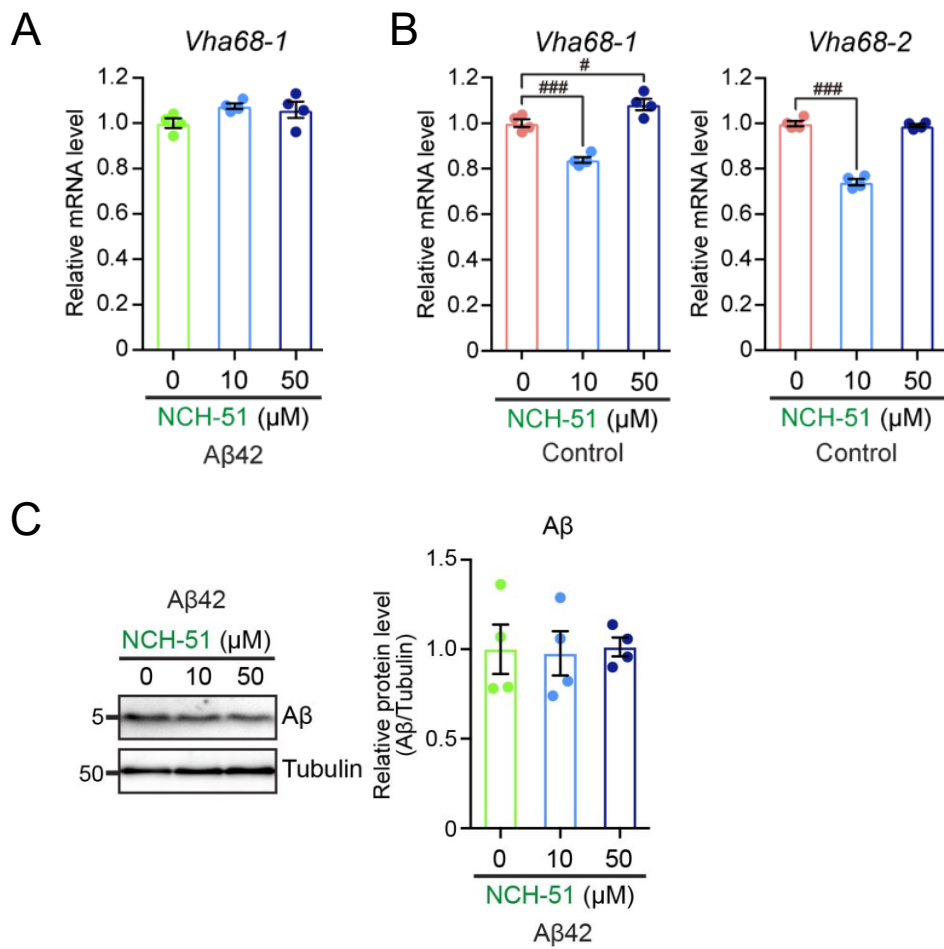

**Fig. S25. A novel compound, NCH-51 suppresses neurodegeneration in Aβ42 flies, related to Figure 6. A,** Administration of NCH-51 did not increase mRNA levels of *Vha68-1* in Aβ42 flies. **B,** mRNA levels of *Vha68-1* and *Vha68-2* in control flies fed with NCH-51 were analyzed by qRT-PCR. n = 4, #p < 0.05, ###p < 0.001 by one-way ANOVA with Dunnett's post hoc test. **C,** Administration of NCH-51 did not affect Aβ42 levels in fly brains. Aβ42 peptides from fly heads were analyzed by western blotting with anti-Aβ antibody. n = 4. The genotypes of the flies were (Aβ42): *elav-GAL4/Y; UAS-Aβ42 /+* and (Control): *elav-GAL4/Y*.

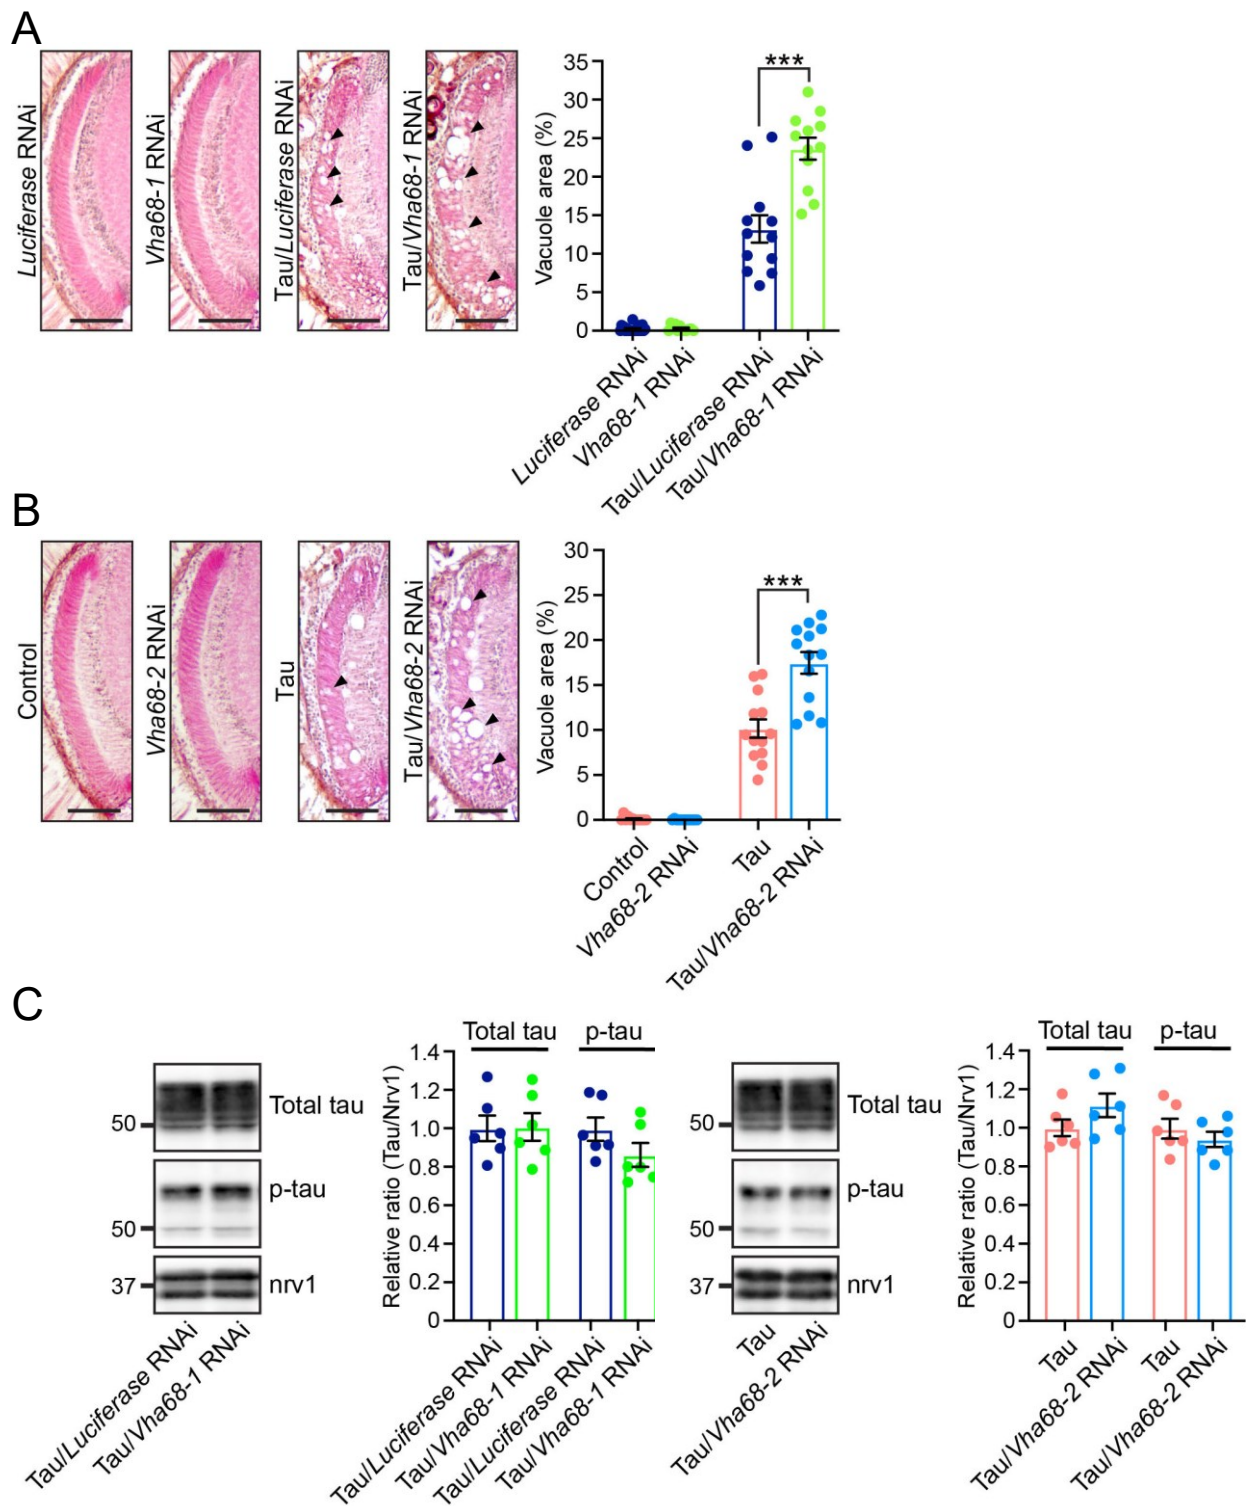

**Fig. S26. Knockdown of *Vha68-1* or *Vha68-2* exacerbates axon degeneration caused by overexpression of human tau, related to STAR Methods.** Knockdown of *Vha68-1* (A) or *Vha68-2* (B) in fly eyes exacerbated axon degeneration in the lamina caused by ectopic overexpression of human tau. Representative images show the lamina in paraffin-embedded head section with hematoxylin and eosin (HE) staining from 7-day-old flies. Scale bars: 50  $\mu$ m. Percentages of vacuole areas in the lamina (indicated by arrowheads in the images) are shown.  $n = 12$  hemispheres, \*\*\* $p < 0.001$  by Student's t-test. (C) Knockdown of *Vha68-1* or *Vha68-2* did not alter either the total or phosphorylation levels of tau. Fly heads expressing tau alone (Tau) or co-expressing tau and RNAi targeting for *Vha68-1* or *Vha68-2* subjected to western blotting with anti-tau or anti-phospho tau (AT8, pS202/T205) antibodies. Nervana (*nrv1*), a fly ortholog of ATPase  $\text{Na}^+/\text{K}^+$  transporting subunit  $\beta$  1, was used as the loading control.  $n = 6$ . The genotypes of the flies were (*Luciferase RNAi*): +/Y; *GMR-GAL4/UAS-Luciferase RNAi*, (*Vha68-1 RNAi*): +/Y; *GMR-GAL4/UAS-Vha68-1 RNAi*, (*Tau/Luciferase RNAi*): +/Y; *GMR-GAL4, UAS-tau/Luciferase RNAi*, (*Tau/Vha68-1 RNAi*): +/Y; *GMR-GAL4, UAS-tau/UAS-Vha68-1 RNAi*, (Control): +/Y; *GMR-GAL4/+*, (*Vha68-2 RNAi*): +/Y; *GMR-GAL4/+*; *UAS-Vha68-2 RNAi/+*, (Tau): +/Y; *GMR-GAL4, UAS-tau/+* and (*Tau/Vha68-2 RNAi*): +/Y; *GMR-GAL4, UAS-tau/+*; *UAS-Vha68-2 RNAi/+*.

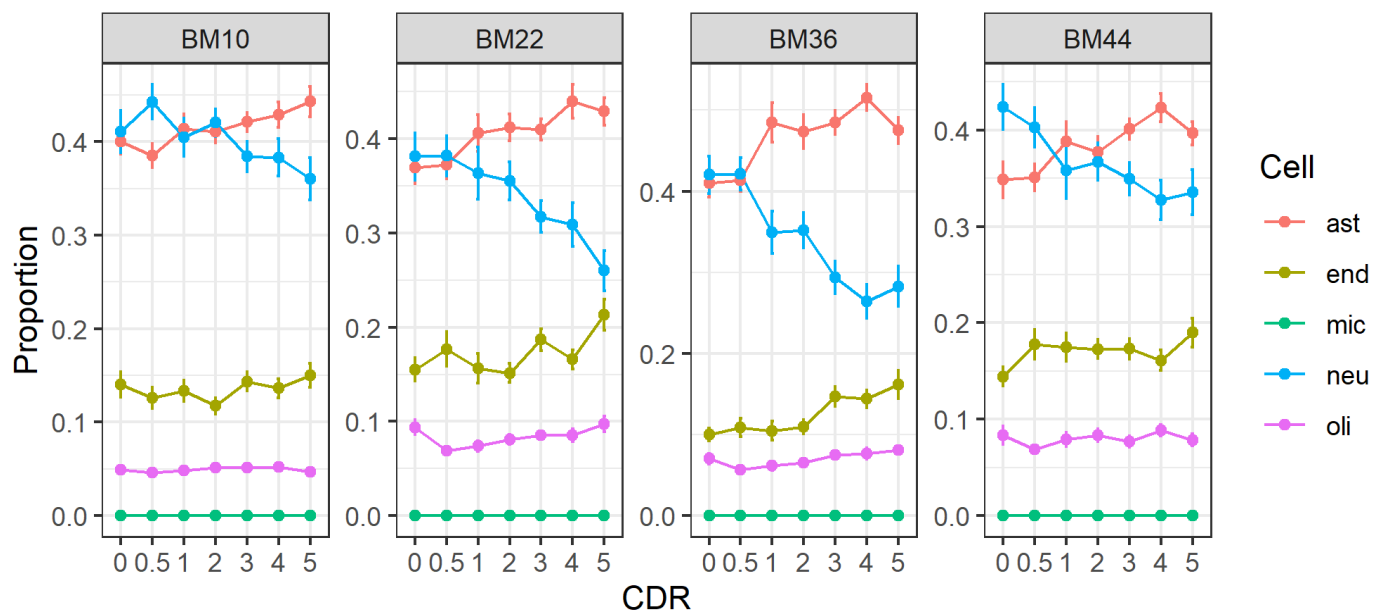

**Fig. S27. Distribution of cell type frequency estimates stratified by CDR, related to STAR Methods.** Error bar denotes standard error. Ast, astrocyte; end, endothelial; mic, microglia; neu, neurons; oli, oligodendrocytes. The proportion of microglia cells was not estimable, likely due to the low sensitivity in estimating cells with low abundance.
